# Supplementary material for: Changes in Caprine Milk Fat Globule Membrane Proteins after Heat Treatment Using a Label-Free Proteomics Technique
Source: MDPI journal article supplement (doi:10.3390/foods11172705), 2022-09-05
Supplement: s1 [file s1]

| UniProt IDs | Gene    | Protein  | RAW_1 | RAW_2 | UP_1  | UP_2  | UHT_1 | UHT_2 | SP_1  | SP_2  |
|-------------|---------|----------|-------|-------|-------|-------|-------|-------|-------|-------|
| AOA452F2M2  | CCT8    | Chaperon | 26.84 | 26.58 | 18.6  | 18.94 | NaN   | NaN   | 20.7  | 19.78 |
| AOA452DUP3  | RPN1    | Dolichyl | 29.58 | 29.75 | 18.81 | 19.24 | NaN   | 18.76 | 25.75 | 25.39 |
| AOA452ECC5  | RPL4    | Ribos_L4 | 28.33 | 27.88 | 18.83 | 19.97 | NaN   | NaN   | NaN   | NaN   |
| AOA452DNT7  | STX19   | Syntaxin | 23.37 | 23.16 | 19.35 | NaN   | 20.69 | 20.4  | 21.08 | 20.9  |
| AOA452EA76  | RPSA    | 40S ribo | 29.05 | 28.99 | 19.4  | 19.54 | NaN   | NaN   | 21.15 | 21.25 |
| AOA452FUU6  | PSME2   | Proteasc | NaN   | 22.06 | 19.71 | NaN   | NaN   | NaN   | NaN   | NaN   |
| AOA452FNY6  | TMEM8A  | Transmen | 22.19 | 21.62 | 19.72 | NaN   | 19.75 | 20.6  | 21.44 | 21.9  |
| AOA452DZN3  | TMEM30B | Cell cyc | 25.9  | 25.52 | 19.86 | 20.07 | 20.16 | NaN   | 22.38 | 22.51 |
| AOA452EYA9  | SELENBP | Selenium | 27.23 | 27.37 | 19.92 | 19.94 | 20.78 | 21.24 | 23.68 | 25.41 |
| AOA452FXG0  | N/A     | F-actin  | 23.71 | 23.6  | 20.03 | 20.07 | NaN   | NaN   | 21.09 | 21.4  |
| AOA452FAR2  | LMAN2   | Lectin,  | 27.75 | 27.36 | 20.18 | NaN   | NaN   | NaN   | 21.54 | 20.29 |
| AOA452ECC6  | PHB     | Prohibit | 24.39 | 24.72 | 20.26 | 20.51 | NaN   | 20.34 | 21.39 | 21.08 |
| AOA452E1M5  | CAPN5   | Calpain  | 23.67 | 23.3  | 20.29 | 21.42 | 21.84 | 22.08 | 23.43 | 23    |
| AOA452FRD9  | EPCAM   | Epitheli | 26.13 | 25.93 | 20.31 | 20.84 | 21.47 | 22.44 | 24.46 | 24.84 |
| AOA452EWG1  | COX5B   | Cytochro | 23.85 | 23.06 | 20.32 | NaN   | NaN   | NaN   | NaN   | NaN   |
| AOA452EWR7  | PSMA3   | Proteasc | 25.58 | 25.81 | 20.34 | 20.18 | NaN   | NaN   | 21.59 | 22.25 |
| AOA452ENI2  | STX7    | Syntaxin | 22.26 | 21.61 | 20.43 | 20.13 | NaN   | NaN   | 22.19 | 21.88 |
| AOA452FIL3  | NPC1    | SSD dom  | 23.85 | 24.15 | 20.49 | 20.72 | 21.76 | 22.04 | 22.79 | 23.3  |
| AOA452DVV1  | LAP3    | Leucine  | 28.08 | 27.88 | 20.51 | 20.26 | 19.23 | 19.38 | 26.79 | 26.06 |
| AOA452FHF8  | PFDN6   | Uncharac | 23.86 | 22.16 | 20.55 | NaN   | NaN   | NaN   | 21.35 | NaN   |
| AOA452EVI7  | RPS3A   | 40S ribo | 28.81 | 27.57 | 20.56 | 22.1  | 19.98 | 20.05 | 20.73 | 20.1  |
| AOA452E3X6  | ADGRE5  | Adhesior | 27.62 | 27.82 | 20.59 | 20.04 | NaN   | 19.9  | 28.68 | 28.62 |
| AOA452E2B3  | PRSS23  | Serine p | 22.47 | 22.34 | 20.63 | 20.76 | 21.17 | NaN   | 21.87 | 21.57 |
| AOA452GOZ2  | SEMA7A  | Semaphor | 28    | 27.8  | 20.64 | 22.18 | 25.05 | 24.34 | 26.88 | 26.92 |
| AOA452EX47  | N/A     | COX6C dc | 23.47 | 23.67 | 20.68 | 20.47 | 20.61 | 20.84 | NaN   | NaN   |
| AOA452FQ19  | C4BPA   | Uncharac | 28.4  | 28.35 | 20.71 | 21.66 | 20.94 | 21.64 | 25.39 | 25.58 |
| AOA452DRZ8  | AKR1A1  | Aldo-ket | 28.09 | 26.8  | 20.72 | NaN   | 20.1  | 19.62 | 23.63 | 23.71 |
| AOA452EQZ4  | MDH1    | Malate c | 25.76 | 25.75 | 20.73 | 20.77 | NaN   | 20.66 | 23.73 | 24.26 |
| AOA452FE61  | EMC7    | ER membr | 23.84 | 23.84 | 20.78 | 21.15 | NaN   | NaN   | NaN   | NaN   |
| AOA452E1R9  | PRDX1   | Thioredo | 27.75 | 27.3  | 20.84 | 22.34 | 21.86 | 22.59 | 23.39 | 23.47 |
| AOA452F2B2  | GNAO1   | G protei | 27.29 | 27.06 | 20.85 | NaN   | 24.16 | 23.72 | 25.41 | 26.06 |
| AOA452E831  | GNAQ    | G protei | 26.56 | 26.54 | 20.87 | NaN   | 23.37 | 22.03 | 24.08 | 24.43 |
| AOA452FTU7  | FLOT1   | Flotilli | 27.38 | 26.7  | 20.87 | 22.32 | 20.51 | NaN   | 25.18 | 24.63 |
| AOA452EDW0  | PBXIP1  | PBX home | 21.22 | 21.86 | 20.89 | NaN   | NaN   | NaN   | NaN   | NaN   |
| AOA452E2H1  | ATP5P0  | Uncharac | 23.37 | 23.34 | 20.9  | 21.2  | NaN   | NaN   | NaN   | NaN   |
| AOA452ETE8  | CCT6A   | Uncharac | 26.27 | 26.61 | 20.9  | 21.12 | NaN   | NaN   | 22.09 | 21.9  |
| AOA452FYA6  | TMPRSS2 | Transmen | 26.47 | 25.98 | 20.97 | 21.42 | NaN   | NaN   | 24.82 | 24.49 |
| AOA452ESM1  | DLST    | Dihydro  | 24.08 | 23.85 | 21.01 | 21.46 | NaN   | 21.02 | NaN   | 22.12 |
| AOA452FS20  | PYD and | PYD and  | 22.85 | 22.66 | 21.03 | 21.16 | NaN   | NaN   | NaN   | 22.24 |
| AOA452E9Y4  | ANP32A  | Uncharac | 21.48 | NaN   | 21.07 | 21.43 | NaN   | NaN   | NaN   | 21.56 |
| AOA452G117  | KRT10   | Keratin  | 22.78 | 22.77 | 21.08 | 20.86 | NaN   | NaN   | NaN   | NaN   |
| A7UAC5      | N/A     | Major pr | 22.15 | 21.78 | 21.09 | 21.03 | 22.91 | 22.87 | 22.36 | 22.18 |
| AOA452FWD9  | DLD     | Dihydro  | 23.55 | 23.03 | 21.09 | 21.23 | NaN   | NaN   | NaN   | 21.62 |
| AOA452DWG5  | SYNGR2  | Synapto  | 25.23 | 24.84 | 21.17 | 20.98 | NaN   | NaN   | 23.72 | 23.79 |
| AOA452FWB2  | PNPLA2  | PNPLA dc | 22.57 | 22.76 | 21.17 | 21.4  | 22.71 | 22.56 | 21.97 | 22.69 |
| AOA452DRV9  | PSAP    | Prosapos | NaN   | NaN   | 21.25 | NaN   | NaN   | NaN   | 25.36 | 25.05 |
| AOA452EWL1  | UQCRC2  | Ubiquinc | 26.46 | 26.37 | 21.25 | NaN   | NaN   | NaN   | 23    | 23.37 |
| AOA452EK14  | LHFPL2  | LHFPL te | 23.91 | 23.88 | 21.26 | 21.54 | 23.15 | 22.85 | 24.27 | 24.11 |
| AOA452E803  | LOC1065 | Uncharac | 25.37 | 25.04 | 21.3  | 21.24 | NaN   | 19.38 | 21.21 | 20.79 |

|            |          |          |       |       |       |       |       |       |       |       |
|------------|----------|----------|-------|-------|-------|-------|-------|-------|-------|-------|
| AOA452ESU9 | LOC10211 | Uncharac | 24.3  | 24.18 | 21.3  | NaN   | NaN   | NaN   | 22.58 | 22.43 |
| AOA452F261 | TCN1     | Transco  | 22.07 | NaN   | 21.34 | 21.83 | NaN   | NaN   | 22.33 | 21.99 |
| AOA452EC41 | EIF4A2   | Eukaryot | 24.78 | 25.4  | 21.35 | 21.19 | NaN   | NaN   | 22.7  | 22.27 |
| AOA452E0X4 | ERAP1    | Aminope  | 24.86 | 25.76 | 21.35 | 21.49 | 23.24 | 23.17 | 22.77 | 23.23 |
| AOA452DW73 | ACO2     | Aconitat | 24.69 | 23.93 | 21.38 | 22.02 | 21.6  | NaN   | NaN   | NaN   |
| AOA452DZT1 | N/A      | 40S ribc | 25.16 | 24.86 | 21.4  | NaN   | NaN   | NaN   | NaN   | NaN   |
| AOA452F283 | SLC3A2   | Solute c | 26.84 | 26.53 | 21.41 | 23.64 | 24.18 | 23.7  | 25.9  | 25.59 |
| AOA452FI53 | SLC6A8   | Transpor | 25.66 | 25.19 | 21.42 | NaN   | 21.83 | 22.61 | 23.21 | 24.24 |
| AOA452FUQ6 | SH3GLB2  | SH3 domæ | 25.75 | 25.59 | 21.43 | 22.08 | 20.7  | 20.83 | 23.62 | 23.9  |
| AOA452ELE7 | C2       | Compleme | 21.02 | NaN   | 21.48 | 21.01 | 25.24 | 25.09 | 23.27 | 22.97 |
| AOA452FQU3 | ITIH1    | Inter-al | NaN   | NaN   | 21.48 | 21.23 | 21.71 | 22.04 | NaN   | NaN   |
| AOA452E5S8 | NCL      | Uncharac | NaN   | NaN   | 21.5  | 21.99 | NaN   | NaN   | NaN   | NaN   |
| AOA452F9H0 | LOC10211 | WAP domæ | 20.45 | 19.87 | 21.5  | 21.95 | 21.99 | 21.49 | NaN   | 20.5  |
| AOA452F0X4 | ATP2B2   | Calcium- | 28.09 | 27.93 | 21.5  | 21.27 | 24.69 | 25.26 | 26.68 | 26.63 |
| AOA452E2H5 | PDZK1IP  | PDZK1 ir | 22.75 | 22.59 | 21.53 | 21.95 | NaN   | 20.88 | 21.85 | 21.89 |
| AOA452FF98 | LIPE     | Lipase I | 24.93 | 25    | 21.58 | NaN   | 23.63 | 23.65 | 24.41 | 24.09 |
| AOA452ENU2 | G6PD     | Glucose- | 25.27 | 24.91 | 21.59 | 21.9  | NaN   | NaN   | NaN   | NaN   |
| AOA452FE95 | RPL11    | Uncharac | 26.75 | 26.66 | 21.59 | 22.63 | NaN   | NaN   | 22.06 | 22.38 |
| AOA452F756 | PCYOX1   | Prenylcy | 25.4  | 25.98 | 21.66 | NaN   | NaN   | NaN   | 24.27 | 23.87 |
| AOA452EL72 | MLEC     | Malectir | 26.97 | 26.88 | 21.67 | NaN   | NaN   | NaN   | 22.43 | 23.58 |
| AOA452FDD0 | N/A      | Uncharac | NaN   | NaN   | 21.68 | 21.36 | NaN   | NaN   | NaN   | NaN   |
| AOA452FND2 | SLC29A1  | Solute c | 25.39 | 25.28 | 21.69 | NaN   | 22.63 | 23.02 | 24.39 | 24.31 |
| AOA452EZB5 | CD55     | Uncharac | 23.09 | 23.46 | 21.69 | NaN   | 23.24 | 23.37 | 25.26 | 25.08 |
| AOA452FGC9 | CAPG     | Capping  | 26.38 | 26.34 | 21.7  | 21.36 | 21.3  | NaN   | 23.37 | 22.26 |
| AOA452E7X0 | SH3BGRL  | SH3 domæ | NaN   | NaN   | 21.73 | 20.99 | NaN   | NaN   | NaN   | NaN   |
| AOA452FTQ1 | NAPA     | NSF attæ | 28.95 | 28.85 | 21.74 | 21.49 | 23.81 | 24    | 27.29 | 27.37 |
| AOA452EU71 | TMED5    | Transmen | NaN   | 24.08 | 21.76 | NaN   | NaN   | 21.82 | NaN   | NaN   |
| AOA452END8 | TMED3    | Transmen | 25.07 | 25.1  | 21.77 | 22.8  | NaN   | NaN   | NaN   | NaN   |
| AOA452DTK8 | AGRN     | Agrin    | 21.92 | 22.02 | 21.8  | NaN   | NaN   | NaN   | 21.74 | 21.93 |
| AOA452F2X0 | SNX5     | Sorting  | 22.13 | 21.97 | 21.8  | NaN   | NaN   | NaN   | 22.42 | 22.47 |
| AOA452DM06 | GOLGA7   | Golgin f | 26.32 | 25.12 | 21.81 | 22.04 | 22.58 | 24.29 | 24.55 | 24.24 |
| AOA452EMT1 | RAB3D    | RAB3D, n | 28.22 | 27.86 | 21.83 | 21.97 | 22.97 | 23.79 | 25.64 | 25.53 |
| AOA452FXH3 | PSMD6    | Proteasc | 24.35 | 25.71 | 21.84 | NaN   | NaN   | NaN   | NaN   | NaN   |
| AOA452DKP9 | SDF2L1   | Stromal  | 24.04 | NaN   | 21.86 | 22.67 | NaN   | NaN   | NaN   | NaN   |
| AOA452FA18 | TMC5     | Transmen | 27.58 | 27.42 | 21.87 | 22.58 | 23.89 | 23.61 | 25.48 | 25.48 |
| AOA452EHH6 | SMIM1    | Small ir | 22.83 | NaN   | 21.88 | NaN   | NaN   | NaN   | 21.28 | 21.66 |
| AOA452FZ04 | APOH     | Apolipor | 25    | 25.65 | 21.89 | 22.43 | 21.88 | 22.73 | 24.21 | 23.26 |
| AOA452FTU1 | SELENOS  | Uncharac | 22.89 | NaN   | 21.9  | 21.46 | NaN   | NaN   | NaN   | NaN   |
| AOA452DQS6 | RAB21    | RAB21, n | 27.03 | 26.65 | 21.91 | 23.77 | 24.59 | 24.77 | 26.18 | 26.18 |
| AOA452DVV9 | LRRC59   | Leucine  | 25.32 | 25.98 | 21.94 | 22.83 | NaN   | NaN   | 22.68 | NaN   |
| AOA452G9R5 | FAM20A   | FAM20A ξ | 24.29 | 24.18 | 21.98 | NaN   | NaN   | 21.68 | 25.24 | 24.1  |
| AOA452F322 | LOC10211 | Peptidas | NaN   | NaN   | 21.98 | 22.03 | NaN   | NaN   | NaN   | NaN   |
| G3EHG5     | N/A      | Perilipi | NaN   | 22.56 | 21.98 | NaN   | NaN   | NaN   | 23.83 | 23.69 |
| AOA452EIR1 | EEF2     | Tr-type  | 29.14 | 29.18 | 21.99 | NaN   | 24.51 | 23.59 | 26.96 | 26.53 |
| AOA452FPR6 | PRDX4    | Peroxi   | 26.58 | 26.5  | 21.99 | 21.88 | 22.47 | NaN   | 25.39 | 24.72 |
| AOA452FU98 | ANGPTL4  | Angiopoi | 22.18 | 22.35 | 22.03 | 22.33 | NaN   | NaN   | NaN   | NaN   |
| AOA452E197 | ITGAV    | Integrir | 23.81 | 24.25 | 22.04 | 21.91 | 21.38 | NaN   | 24.87 | 23.98 |
| AOA452EY83 | DNAJB2   | DnaJ heæ | 24.99 | 24.79 | 22.04 | 22.15 | NaN   | NaN   | 22.96 | 22.74 |
| AOA452EQZ3 | APH1A    | Aph-1 hc | 24.84 | 24.22 | 22.06 | 22.18 | NaN   | NaN   | 23.57 | 23.48 |
| AOA452FQZ4 | QSOX1    | Sulphydr | 24.27 | 24.39 | 22.06 | 22.16 | 26.86 | 27.03 | 25.47 | 26.11 |

|            |           |                                    |       |       |       |       |       |       |       |       |
|------------|-----------|------------------------------------|-------|-------|-------|-------|-------|-------|-------|-------|
| AOA452EP01 | MGST1     | Microsomal                         | 25.34 | 25.62 | 22.07 | NaN   | NaN   | NaN   | NaN   | NaN   |
| AOA452FT24 | RPS4X     | 40S ribosomal                      | 28.37 | 28.15 | 22.07 | 22.13 | 20.79 | NaN   | 20.27 | 20.14 |
| AOA452ET76 | SNRPD2    | Small nuclear                      | NaN   | NaN   | 22.07 | 21.77 | NaN   | NaN   | NaN   | NaN   |
| AOA452DWG6 | MYADM     | Myeloid                            | 25.38 | 25.2  | 22.11 | 21.93 | 22.57 | 22.93 | 24.7  | 24.83 |
| AOA452FNI4 | FIS1      | Mitochondrial                      | 25.02 | 25.44 | 22.12 | 21.92 | 21.69 | 22.14 | 25.27 | 25.01 |
| AOA452FQ03 | RRBP1     | Ribosomal                          | 26.5  | 26.09 | 22.12 | 22.4  | NaN   | 22.02 | 23.43 | 22.61 |
| AOA452E2I5 | IQGAP1    | IQ motif                           | 24.63 | 25.19 | 22.12 | 22.39 | NaN   | NaN   | 21.95 | 22.05 |
| AOA452E5R9 | SLC9A3R   | Na(+)/H(+) exchanger               | 24.63 | 24.25 | 22.12 | 22.04 | NaN   | 20.81 | 22.87 | 23.09 |
| AOA452DU53 | CNP       | 2',3'-cyclic nucleotide            | 25.38 | 25.13 | 22.12 | 21.83 | 23.74 | 23.71 | 25.16 | 24.93 |
| AOA452DPN1 | SHMT2     | Serine hydroxymethyltransferase    | 22.32 | 22.06 | 22.13 | NaN   | 22.04 | 21.71 | NaN   | NaN   |
| AOA452G9G0 | RPL38     | Uncharacterized                    | 24.48 | 24.47 | 22.13 | 22.78 | NaN   | NaN   | 22.36 | NaN   |
| AOA452EN49 | HNRNPK    | Uncharacterized                    | 22.6  | NaN   | 22.14 | 22.55 | NaN   | NaN   | NaN   | NaN   |
| AOA452EEZ4 | MOB1B     | MOB kinase                         | 26.77 | 26.89 | 22.15 | 21.85 | 22.44 | 21.63 | 24.52 | 24.79 |
| AOA452G6M6 | LOC102111 | Uncharacterized                    | 24.24 | 23.92 | 22.16 | 21.35 | NaN   | NaN   | NaN   | 21.04 |
| B6RT17     | RAB27A    | RAB27A, member of the RAB27 family | 25.63 | 25.66 | 22.2  | 22.16 | 23.78 | 23.44 | 24.19 | 24.29 |
| AOA452FNH6 | EIF1B     | Eukaryotic initiation factor       | 24.72 | 24.61 | 22.2  | 22.45 | 22.03 | 21.9  | 22.92 | 23.61 |
| P00712     | LALBA     | Alpha-lactalbumin                  | NaN   | NaN   | 22.2  | 22.32 | 22.42 | 22.36 | 22.86 | 22.6  |
| A5JSS3     | NDUFA4    | NADH dehydrogenase                 | 23.35 | 22.74 | 22.23 | 22.23 | NaN   | NaN   | NaN   | NaN   |
| AOA452DTF9 | CLEC3B    | C-type lectin                      | 23.55 | 23.49 | 22.24 | 22.3  | 21.89 | 21.77 | 24.02 | 24.06 |
| AOA452FBP1 | TMED4     | Transmembrane                      | 24.66 | 25.02 | 22.24 | 22.4  | NaN   | NaN   | 21.89 | 21.94 |
| AOA452EGP3 | TXN       | Thioredoxin                        | 27.82 | 28    | 22.26 | 23    | 22.51 | NaN   | 26.31 | 23.97 |
| AOA452E0Z2 | GAPDHS    | Glyceraldehyde                     | 22.6  | 22.27 | 22.27 | 21.94 | 21.86 | 21.42 | NaN   | NaN   |
| AOA452EP50 | UBQLN1    | Ubiquilin                          | 24.94 | 25.03 | 22.28 | NaN   | NaN   | NaN   | 23.14 | 23.23 |
| AOA452EGC4 | GOT2      | Aspartate aminotransferase         | 24.22 | 24.3  | 22.28 | 22.27 | NaN   | NaN   | NaN   | NaN   |
| AOA452G990 | AHCY      | Adenosylhomocysteinase             | 27.94 | 27.93 | 22.28 | 22.84 | 22.75 | NaN   | 24.62 | 24.66 |
| AOA452DZZ5 | LOC102111 | SERPINC1                           | 25.88 | 25.98 | 22.29 | 22.98 | 24.85 | 24.73 | 25.75 | 26    |
| Q3LUG9     | N/A       | Mitochondrial                      | NaN   | NaN   | 22.29 | NaN   | NaN   | 20.42 | NaN   | NaN   |
| AOA452EZK6 | RAB22A    | RAB22A, member of the RAB22 family | 26.61 | 25.5  | 22.3  | NaN   | 23.21 | 21.81 | 24.66 | 23.97 |
| AOA452DRQ8 | ER01A     | Endoplasmic reticulum              | 25.43 | 26.21 | 22.3  | 21.71 | 23.49 | 23.48 | 24.55 | 24.98 |
| AOA452E9E9 | CNPY2     | Saposin                            | 25.33 | 24.26 | 22.33 | 22.63 | 24.62 | 24.82 | 24.32 | 24.12 |
| AOA452G6W6 | NSFL1C    | NSFL1 class                        | 23.38 | 23.3  | 22.34 | 22.15 | NaN   | NaN   | NaN   | NaN   |
| Q9TTY8     | GSTP1     | Glutathione                        | 26.13 | 25.9  | 22.36 | 22.99 | 22.21 | 22.19 | 25.05 | 24.78 |
| AOA452FKN5 | ANKRD13   | Ankyrin                            | 26.71 | 25.71 | 22.38 | NaN   | 24.18 | NaN   | NaN   | 21.32 |
| AOA452FKK3 | PFDN2     | Uncharacterized                    | 23.73 | 24.8  | 22.38 | 22.22 | NaN   | NaN   | 23.07 | 23    |
| AOA452DRN1 | CTSD      | SNRPD1                             | NaN   | NaN   | 22.39 | NaN   | NaN   | NaN   | 23.31 | 23.25 |
| AOA452ELN3 | MSRA      | Methionine                         | 23.11 | 23.79 | 22.39 | NaN   | NaN   | NaN   | 23.57 | 23.24 |
| AOA452DKU0 | RPS24     | 40S ribosomal                      | 24.97 | 24.7  | 22.39 | 22.73 | 20.52 | NaN   | NaN   | NaN   |
| AOA452DKU9 | VCL       | Vinculin                           | 23.32 | 22.92 | 22.4  | NaN   | 24.14 | 23.61 | 23.29 | 23.48 |
| AOA452FAB7 | SARS      | Seryl-tRNA                         | 23.5  | 24.29 | 22.41 | 22.06 | NaN   | NaN   | 23.36 | 23.37 |
| G1CQF2     | HSP70.1   | Heat shock                         | 29.12 | 29.1  | 22.41 | 22.41 | NaN   | NaN   | 25.73 | 24.73 |
| AOA452FRZ3 | COX6B1    | Cytochrome                         | 24.8  | 24.69 | 22.43 | 22.16 | NaN   | NaN   | NaN   | NaN   |
| AOA452FQK4 | ABHD14B   | Abhydrolase                        | 24.56 | 24.27 | 22.44 | 21.37 | NaN   | NaN   | NaN   | 23.32 |
| AOA452EYS8 | PHB2      | Prohibitin                         | 26.05 | 26.76 | 22.44 | 21.55 | NaN   | NaN   | NaN   | 22.1  |
| AOA452FK27 | HSPA13    | Heat shock                         | 23.94 | 24.5  | 22.45 | 22.59 | NaN   | NaN   | 25.6  | 25.3  |
| AOA452G4S6 | ELANE     | Elastase                           | 25.58 | 25.65 | 22.46 | 22.44 | NaN   | NaN   | 22.69 | 22.91 |
| AOA452DT76 | ATP11B    | Phospholipase                      | 25.4  | 26.69 | 22.46 | 22.49 | NaN   | NaN   | 25.08 | 26.33 |
| AOA452EW53 | RCN2      | Reticulon                          | 24.33 | 23.31 | 22.47 | 23.16 | NaN   | NaN   | NaN   | 22.51 |
| AOA452F5Q3 | STXBP2    | Uncharacterized                    | 27.44 | 27.4  | 22.47 | 21.54 | 24.01 | 24.26 | 25.79 | 25.52 |
| AOA452EXD0 | FXVD6     | FXVD domain                        | 23.28 | 23.34 | 22.48 | 21.93 | 21.62 | 21.27 | 22.83 | 22.58 |
| AOA452ELX4 | RPL15     | Ribosomal                          | 27.77 | 27.77 | 22.49 | 22.42 | NaN   | 19.66 | NaN   | 22.84 |

|            |         |                      |       |       |       |       |       |       |       |       |
|------------|---------|----------------------|-------|-------|-------|-------|-------|-------|-------|-------|
| AOA452E8Q0 | LGALS3  | Galectin             | 21.73 | 22.27 | 22.49 | 22.2  | 20.94 | NaN   | NaN   | NaN   |
| AOA452EW49 | LOC1021 | Uncharacterized      | NaN   | NaN   | 22.5  | 22.81 | 23.13 | 23.09 | 22.79 | 22.99 |
| AOA452EVP1 | APOD    | Apolipoprotein       | 25.04 | 24.08 | 22.51 | 22.25 | 22.48 | 22.29 | 22.98 | NaN   |
| AOA452EJK8 | P4HA1   | Prolyl 4-hydroxylase | 22.45 | 22.62 | 22.51 | 22.57 | NaN   | NaN   | NaN   | NaN   |
| AOA452EK81 | N/A     | Uncharacterized      | 22.4  | 22.36 | 22.52 | 23    | NaN   | NaN   | 23.05 | 22.94 |
| AOA452G2Z3 | CHMP1A  | Charged              | 25.07 | 24.81 | 22.53 | 22.68 | NaN   | NaN   | 25.39 | 25.35 |
| AOA452ELS1 | LOC1021 | SERPINC1             | NaN   | NaN   | 22.54 | 23.35 | 21.61 | 22.02 | NaN   | NaN   |
| AOA452FJ07 | LOC1021 | SERPINC1             | NaN   | NaN   | 22.54 | 21.97 | 21.66 | 21.77 | NaN   | NaN   |
| AOA452F9Y6 | RPS5    | Ribosomal            | 26.06 | 26.13 | 22.55 | NaN   | NaN   | NaN   | NaN   | NaN   |
| AOA452F2Z2 | LOC1021 | GLOBIN               | NaN   | NaN   | 22.55 | 22.8  | NaN   | 22.65 | 24.21 | 24.12 |
| P80601     | RIDA    | 2-iminobiotin        | NaN   | NaN   | 22.56 | 22.13 | 21.13 | NaN   | 21.65 | NaN   |
| AOA452EZU7 | RHEB    | Uncharacterized      | 28.52 | 28.48 | 22.56 | 22.75 | 23.41 | 23.68 | 25.58 | 25.42 |
| AOA452E1K0 | CMPK1   | UMP-CMP              | 26.29 | 26.34 | 22.58 | 22.39 | NaN   | 21.82 | 26.27 | 26.29 |
| AOA452G373 | RPL28   | Ribosomal            | 27.23 | 26.48 | 22.58 | 23.48 | 23.15 | NaN   | NaN   | 21.79 |
| AOA452FM11 | TUBB4B  | Tubulin              | 23.46 | 23.47 | 22.59 | 22.91 | 20.87 | 22.12 | 22.88 | 22.8  |
| AOA452FRD3 | CLINT1  | Clathrin             | 24.31 | 24.21 | 22.59 | 22.45 | 22.04 | 21.86 | 23.37 | 23.39 |
| S5U2L5     | BPI     | Bactericidal         | 27.91 | 27.59 | 22.59 | 24.76 | 24.99 | 25.41 | 28.91 | 28.39 |
| AOA452EE39 | ITM2B   | Integral             | 25.1  | 24.55 | 22.6  | 22.61 | 20.76 | NaN   | 26.05 | 25.9  |
| AOA452EWB0 | MCEMP1  | Uncharacterized      | NaN   | NaN   | 22.6  | 21.9  | NaN   | NaN   | NaN   | NaN   |
| AOA452DRY1 | UBL3    | Ubiquitin            | 26.44 | 26.5  | 22.6  | 24.5  | 25.63 | 25.69 | 26.13 | 26.09 |
| AOA452ELT4 | PRTN3   | Proteinase           | 24.51 | 24.12 | 22.61 | 22.2  | NaN   | NaN   | 23.07 | 23.25 |
| AOA452EUH4 | BPI     | Uncharacterized      | 25.44 | 25.48 | 22.62 | 22.4  | NaN   | NaN   | 26.44 | 26.38 |
| AOA452FDR2 | RPS8    | 40S ribosomal        | 28.01 | 27.77 | 22.66 | 22.77 | 19.37 | 19.17 | 21.86 | 20.12 |
| AOA452DLC3 | VAPA    | VAMP associated      | 24.01 | 24.59 | 22.66 | NaN   | NaN   | NaN   | NaN   | NaN   |
| AOA452F525 | SFTPD   | C-type lectin        | 23.28 | 23.7  | 22.66 | 22.25 | 23.11 | 23.38 | 23.81 | 23.89 |
| AOA452EL60 | ACTR2   | Actin-related        | 25.73 | 25.64 | 22.68 | 22.64 | NaN   | NaN   | 24.16 | 23.78 |
| AOA452FDF6 | MTDH    | Metadherin           | 23.04 | 23.56 | 22.69 | 22.65 | NaN   | NaN   | NaN   | NaN   |
| AOA452F147 | AUP1    | AUP1 like            | 26.77 | 26.47 | 22.69 | NaN   | 24.24 | 24.05 | 25.78 | 25.5  |
| AOA452G7E5 | TG      | Thyroglobulin        | NaN   | NaN   | 22.73 | 22.65 | 23.62 | 23.98 | 23.75 | 23.86 |
| AOA452EEQ0 | LOC1086 | Uncharacterized      | 25.12 | 25.1  | 22.73 | 22.78 | 22.21 | 22.52 | 24.77 | 24.72 |
| AOA452DJZ6 | CNDP2   | Carnosine            | 24.85 | 24.42 | 22.74 | 22.73 | 22.76 | 22.86 | 23.56 | 24.12 |
| AOA452FEW9 | BTF3    | Transcription        | 23    | 23.11 | 22.74 | 22.82 | NaN   | NaN   | NaN   | NaN   |
| AOA452EG05 | PRKCSH  | Protein              | 25.76 | 25.64 | 22.76 | 22.3  | NaN   | NaN   | 25.65 | 25.62 |
| AOA452FY20 | CAB39   | Calcium              | 25.91 | 26.22 | 22.76 | 21.92 | 21.94 | 22.51 | 24.64 | 24.09 |
| AOA452G137 | GC      | GC vitamin           | 24.27 | 24.05 | 22.78 | NaN   | NaN   | NaN   | 25.03 | 25.26 |
| AOA452G6U3 | RHOF    | Ras homolog          | 25.13 | 25.05 | 22.78 | 22.93 | 24.78 | 24.72 | 25.33 | 25.49 |
| AOA452FWS6 | N/A     | Uncharacterized      | 27.38 | 26.09 | 22.78 | NaN   | 22.72 | 21.68 | 28.12 | 27.83 |
| AOA452FXM5 | VDAC1   | Voltage              | 26.03 | 26.81 | 22.81 | 21.98 | NaN   | NaN   | NaN   | NaN   |
| AOA452GBG0 | N/A     | Ribosomal            | 26.64 | 26.57 | 22.81 | 23.13 | NaN   | 20.44 | 22.35 | 22.26 |
| AOA452EGN1 | RHOG    | Ras homolog          | 25.94 | 26.04 | 22.82 | 23.37 | 24.58 | 24.44 | 25.92 | 25.7  |
| AOA452G6D2 | PGD     | 6-phosphatidyl       | 27.01 | 26.59 | 22.83 | 21.98 | 25.18 | 24.78 | 26.45 | 26.16 |
| AOA452DTS3 | ANKRD22 | Ankyrin              | 25.53 | 25.8  | 22.85 | 22.57 | 24.71 | 24.84 | 25.31 | 25.06 |
| AOA452EZJ3 | MAL2    | Mal, T cell          | 26.58 | 26.42 | 22.87 | NaN   | NaN   | 21.85 | 24.52 | 24.37 |
| AOA452DVL5 | LOC1086 | Uncharacterized      | 25.83 | 25.69 | 22.89 | NaN   | NaN   | NaN   | 21.98 | NaN   |
| AOA452G5D5 | RPL10A  | Ribosomal            | 27.02 | 27.43 | 22.9  | 23.58 | 22.09 | 20.38 | 23.19 | 22.87 |
| AOA452FJ15 | NME2    | Nucleoside           | 27.28 | 27    | 22.9  | 24.36 | NaN   | 20.01 | 25.82 | 25.46 |
| AOA452DN94 | PITPNB  | Phosphatidyl         | 28.47 | 28.43 | 22.91 | 23.97 | 25.51 | 25.43 | 27.04 | 27.15 |
| AOA452GOW0 | RPL8    | Ribosomal            | 27.07 | 26.82 | 22.92 | 23.38 | 20.97 | NaN   | 22.18 | 22.67 |
| AOA452FYF6 | AK3     | GTP:AMP              | NaN   | NaN   | 22.93 | 23.03 | NaN   | NaN   | NaN   | NaN   |
| A5JST3     | N/A     | Translation          | 25.92 | 25.93 | 22.93 | NaN   | NaN   | NaN   | 24.06 | 24.32 |

|            |         |                |       |       |       |       |       |       |       |       |
|------------|---------|----------------|-------|-------|-------|-------|-------|-------|-------|-------|
| AOA452G8G7 | SERBP1  | SERPINE1       | 23.8  | 24.13 | 22.94 | 23.49 | NaN   | NaN   | NaN   | NaN   |
| AOA452EB62 | N/A     | Uncharac       | 24.16 | 24.65 | 22.95 | 22.91 | NaN   | NaN   | NaN   | NaN   |
| AOA452E8H3 | LGALS3  | Galectin       | 25.56 | 25.7  | 22.95 | 21.72 | 21.83 | NaN   | 25.25 | 24.95 |
| AOA452DW85 | RPL7    | Uncharac       | 27.65 | 27.58 | 22.96 | 23.06 | NaN   | NaN   | NaN   | 22.55 |
| AOA452FMD4 | RAB13   | Uncharac       | 25.49 | 25.28 | 22.96 | 23.06 | 24.02 | 23.9  | 24.94 | 24.79 |
| AOA452FQK5 | MIF     | Macrophage     | 24.88 | 25.24 | 22.97 | 23.25 | 22.09 | 22.69 | 24.17 | 24.01 |
| AOA452FE54 | IER3IP1 | Immediate      | 23.69 | 25.67 | 23    | 23.12 | NaN   | NaN   | 22.96 | 23.07 |
| AOA452FTV0 | LOC1086 | Annexin        | 25.14 | 25.19 | 23.03 | 23.55 | 23.38 | 23.61 | 24.69 | 24.85 |
| AOA452FC08 | PITPNA  | Phosphatidyl   | 26.37 | 26.28 | 23.03 | 23.22 | 24.01 | 24.01 | 25.6  | 25.61 |
| AOA097C2Z0 | RPLP0   | 60S acidic     | 29.09 | 29.64 | 23.03 | 21.65 | NaN   | NaN   | 25.31 | 24.62 |
| AOA452DXS5 | ARF6    | ADP ribosyl    | 26.53 | 26.71 | 23.04 | 23.69 | 24.57 | 24.69 | 25.47 | 25.53 |
| AOA452EC63 | BCL2L15 | BCL2 like      | 23.02 | 22.81 | 23.04 | 23.38 | NaN   | NaN   | 22.58 | 22.62 |
| AOA452F9G8 | RPL14   | Ribosome       | 27.45 | 27.43 | 23.04 | 22.88 | 21.96 | 22.42 | 22.55 | 22.32 |
| AOA452FC02 | SLC5A1  | Uncharac       | 27.49 | 27.67 | 23.04 | 22.98 | 24.93 | 25.24 | 26.41 | 26.35 |
| AOA452EX53 | LOC1065 | Serum albumin  | 22.32 | 22.65 | 23.06 | 23.75 | 22.59 | 22.78 | 22.91 | 22.86 |
| AOA452FR38 | RPL12   | Uncharac       | 27.23 | 27.5  | 23.06 | 23.18 | 22.3  | NaN   | 25.28 | 24.95 |
| AOA452G3W0 | OLFML3  | Olfactory      | 24.96 | 25.15 | 23.06 | 22.89 | 23.18 | 23.21 | 24.79 | 24.58 |
| AOA452DVX7 | LOC1021 | Peptidase      | 24.49 | 25.98 | 23.06 | 22.73 | NaN   | NaN   | NaN   | NaN   |
| AOA452FPC1 | HNRNPC  | RRM domain     | NaN   | NaN   | 23.07 | 22.74 | NaN   | NaN   | NaN   | NaN   |
| AOA452G0P1 | NCF2    | Neutrophil     | NaN   | NaN   | 23.07 | 20.6  | 18.63 | 18.77 | 19.18 | 17.82 |
| AOA452DP05 | CHMP6   | Charged        | 26.35 | 25.84 | 23.07 | 22.87 | 24.07 | 24.32 | 24.68 | 24.76 |
| AOA452G6G9 | ERLIN2  | ER lipid       | 29.53 | 29.86 | 23.09 | 24.53 | NaN   | NaN   | 27.62 | 27.67 |
| AOA452FMD5 | GLIPR2  | SCP domain     | 24.53 | 24.4  | 23.1  | 23.28 | 23    | 23.27 | 23.45 | 22.96 |
| AOA452E1A4 | PSME1   | Protease       | 24.72 | 24.14 | 23.11 | 22.56 | 21.02 | 20.9  | 23.23 | 22.7  |
| AOA452FNU3 | LOC1021 | Uncharac       | 27.13 | 27.38 | 23.11 | 22.56 | NaN   | NaN   | 23.52 | 23.7  |
| AOA452FYL8 | GNAI3   | G protein      | 26.55 | 25.8  | 23.12 | 23.31 | 25.06 | 24.65 | 26.13 | NaN   |
| AOA452FIH6 | MCFD2   | Multiple       | 28.47 | 28.26 | 23.13 | 22.06 | NaN   | NaN   | 28.86 | 29.24 |
| AOA452EEP5 | MSN     | Moesin         | 23.67 | 23.39 | 23.13 | 23.56 | NaN   | NaN   | 23.91 | 23.32 |
| AOA452FM54 | PARK7   | Parkinson      | 24.97 | 25.01 | 23.13 | 23.88 | NaN   | NaN   | 24.89 | 24.02 |
| AOA452EMA0 | PSMA7   | Protease       | 25.04 | 25.69 | 23.13 | 23.17 | NaN   | NaN   | 22.85 | 22.64 |
| AOA452FKI3 | UGP2    | UTP-glucose    | 29.87 | 29.82 | 23.14 | 24.61 | NaN   | NaN   | 26.75 | 26.92 |
| AOA452FZD1 | RPL22   | Ribosome       | 26.96 | 26.85 | 23.15 | 23.42 | NaN   | NaN   | 22.73 | NaN   |
| AOA452DP35 | N/A     | L-lactate      | 23.71 | 23.6  | 23.15 | 22.78 | 22.89 | 22.77 | 23.57 | 23.53 |
| AOA452E178 | N/A     | Histone        | 21.66 | 22.43 | 23.16 | 22.87 | 19.33 | 20.58 | 20.59 | 21.44 |
| AOA452EFS9 | RPL34   | Ribosome       | 26.55 | 26.62 | 23.17 | 23.1  | 21.42 | NaN   | 22.97 | 23.24 |
| AOA452ECV2 | RPS14   | Uncharac       | 27.65 | 27.64 | 23.18 | 23.53 | NaN   | NaN   | 22.09 | 23.86 |
| AOA452E5B4 | PRDX5   | Peroxiredoxin  | 24.2  | 25.2  | 23.19 | 23.33 | 22.01 | NaN   | 24.13 | 24.22 |
| AOA452FWX5 | N/A     | Ig-like        | 25.16 | 25.44 | 23.2  | 23.47 | 24.51 | 24.89 | 24.14 | 23.99 |
| AOA452FUR0 | UBXN4   | UBX domain     | 24.67 | 24.69 | 23.22 | 23.38 | 23.52 | 23.39 | 24.33 | 24.51 |
| AOA452DRK5 | HPX     | Hemopexin      | NaN   | NaN   | 23.23 | 23.5  | 25.93 | 24.27 | NaN   | 23.3  |
| AOA452DNE9 | LOC1021 | Uncharac       | 23.04 | 22.78 | 23.24 | 23.35 | 24.16 | 23.49 | 24.67 | 23.43 |
| AOA452F6M6 | AP3B1   | AP-3 complex   | NaN   | NaN   | 23.25 | 22.79 | 23.6  | 23.29 | 22.67 | NaN   |
| AOA452FWS5 | SLC39A7 | Solute carrier | 24.45 | 24.97 | 23.25 | 23.2  | NaN   | NaN   | 22.88 | 22.09 |
| AOA452E238 | LOC1021 | Ribosome       | 28.27 | 28.83 | 23.28 | 23.5  | 21.55 | NaN   | 24.38 | 24.09 |
| AOA452EVH6 | ANXA6   | Annexin        | 26.73 | 26.95 | 23.3  | 22.15 | 24.6  | 24.57 | 26.72 | 26.41 |
| AOA452G3B2 | SEC61B  | Protein        | 24.02 | 23.93 | 23.31 | 23.08 | 20.88 | NaN   | 22.38 | 22.38 |
| AOA452GB27 | RPS11   | Ribosome       | 27.89 | 25.52 | 23.32 | 23.36 | NaN   | NaN   | NaN   | NaN   |
| AOA452EMY5 | FGG     | Fibrinogen     | 28.83 | 28.82 | 23.32 | 23.09 | 25.4  | 25.03 | 27.89 | 27.82 |
| AOA452F3L8 | TUBA1B  | Tubulin        | 25.76 | 25.16 | 23.33 | 24.03 | 22.84 | 22.92 | 24.68 | 24.64 |
| AOA452ESM6 | ARPC4   | Actin-related  | 25.92 | 26.03 | 23.34 | 23.04 | 22.66 | 22.79 | 25.17 | 25.12 |

|            |         |           |       |       |       |       |       |       |       |       |
|------------|---------|-----------|-------|-------|-------|-------|-------|-------|-------|-------|
| AOA452EAA6 | N/A     | Uncharac  | 26.44 | 26.38 | 23.34 | 23.38 | NaN   | NaN   | NaN   | NaN   |
| AOA452E613 | TALD01  | Transalc  | 22.45 | 21.94 | 23.35 | NaN   | 22.33 | 21.52 | 23.78 | 23.87 |
| AOA452DUS0 | ACO1    | Aconitas  | 28.35 | 28.2  | 23.36 | NaN   | 23.58 | 23.39 | 25.41 | 25.79 |
| AOA452DKT5 | SNRPD3  | Small nu  | NaN   | NaN   | 23.36 | 23.62 | NaN   | NaN   | NaN   | NaN   |
| AOA452FUC4 | PPBP    | C-X-C me  | 23.91 | 23.89 | 23.36 | 23.85 | 21.31 | 21.44 | 22.97 | 23.28 |
| AOA452E7W7 | LOC1086 | C-type I  | 24.47 | 24.08 | 23.37 | 23.28 | 22.26 | NaN   | 25.07 | 25.25 |
| AOA452FMT2 | LOC1086 | S5 DRBM   | 28.46 | 28.57 | 23.37 | 23.28 | NaN   | NaN   | 22.27 | 20.75 |
| AOA452E432 | PROS1   | Protein   | 22.49 | 22.67 | 23.37 | 24.01 | 23.22 | NaN   | 24.66 | 24.49 |
| AOA452FEY7 | CHMP4A  | Charged   | 25.08 | 25.32 | 23.37 | 23.38 | NaN   | NaN   | 24.84 | 23.69 |
| AOA452EFS5 | LSS     | Terpene   | 28.66 | 28.64 | 23.37 | 21.86 | 26.3  | 26.48 | 27.83 | 27.78 |
| AOA452EX45 | LOC1021 | Uncharac  | 28.47 | 28.1  | 23.39 | 24.02 | 25.17 | 24.75 | 25.69 | 27.13 |
| AOA452EHX9 | LOC1021 | Cytochro  | 24.53 | 25.03 | 23.4  | 23    | NaN   | NaN   | 22.84 | NaN   |
| AOA452ELY8 | LOC1021 | Ribosome  | 28.35 | 28.18 | 23.41 | 23.7  | NaN   | NaN   | NaN   | 23.36 |
| AOA452EBH4 | ATP5PB  | ATP synt  | 26.83 | 25.57 | 23.41 | 23.2  | NaN   | NaN   | 21.41 | NaN   |
| AOA452G388 | MOGS    | Mannosyl  | 24.8  | 25.62 | 23.41 | NaN   | NaN   | NaN   | NaN   | NaN   |
| AOA452EP10 | KRT71   | Keratin   | NaN   | NaN   | 23.43 | 23.67 | NaN   | NaN   | NaN   | NaN   |
| AOA452FUL8 | GPX4    | Uncharac  | 25.7  | 25.62 | 23.45 | 23.75 | 24.36 | 24.49 | 26.01 | 25.68 |
| AOA452EJX2 | RTN3    | CCT4      | 26.53 | 26.72 | 23.49 | 23.52 | 22.83 | 22.79 | 24.83 | 24.99 |
| AOA452EU40 | RPL23   | Uncharac  | 26.02 | 24.32 | 23.49 | 23.33 | NaN   | NaN   | NaN   | 23.04 |
| AOA452E7S2 | RPL9    | Uncharac  | 26.92 | 27.19 | 23.49 | 23.02 | NaN   | NaN   | NaN   | NaN   |
| AOA452F9F5 | N/A     | Ig-like   | 23.02 | 22.57 | 23.49 | 23.98 | 24.33 | 24.61 | NaN   | 23.29 |
| AOA452FWU9 | RPS16   | Ribosome  | 28.01 | 28.16 | 23.5  | 23.41 | NaN   | NaN   | 23.41 | 22.85 |
| AOA452ECA8 | ITGAL   | VWFA don  | 25.07 | 25.02 | 23.5  | 23.5  | 22.55 | 22.44 | 24.23 | 24.59 |
| AOA452DZN6 | PHIP    | Pleckstr  | 23.48 | 23.24 | 23.52 | 23.95 | 24.98 | 24.89 | 23.88 | 23.87 |
| AOA452EQT0 | FCER1G  | Fc fragm  | NaN   | NaN   | 23.52 | 24.07 | NaN   | NaN   | NaN   | NaN   |
| AOA452DRM6 | SNRPD1  | Small nu  | NaN   | NaN   | 23.55 | 23.68 | NaN   | NaN   | NaN   | NaN   |
| AOA452ELB1 | SLC7A4  | Solute c  | 28.39 | 27.99 | 23.55 | 23.57 | 25.04 | 25.36 | 27.63 | 26.36 |
| AOA452GB32 | ATP5F1D | ATP synt  | 24.05 | 24.06 | 23.57 | 23.64 | NaN   | NaN   | 23.87 | 23.94 |
| AOA452F509 | ATP5F1C | ATP synt  | 24.9  | 25.41 | 23.57 | 23.7  | NaN   | NaN   | 23.35 | 23.79 |
| AOA452G9H1 | EEF1B2  | Uncharac  | 26.3  | 27.58 | 23.57 | 23.84 | NaN   | NaN   | 24.48 | 24.18 |
| AOA452FSH3 | CAPZA1  | F-actin   | 27.94 | 28.08 | 23.57 | 24.26 | 22.78 | 22.17 | 25.76 | 25.31 |
| AOA452FID4 | PDCD10  | Uncharac  | 26.73 | 26.78 | 23.59 | 24.19 | 22.97 | 22.9  | 25.63 | 25.4  |
| AOA452DL82 | ANXA11  | Annexin   | 24.81 | 24.82 | 23.6  | 23.67 | 23.73 | 23.63 | 25.64 | 25.28 |
| AOA452FJ56 | NPTN    | Neurople  | 27.45 | 27.49 | 23.6  | 23.41 | 24.12 | 23.86 | 26.73 | 26.53 |
| G1DFP3     | THBS1   | Thrombos  | 23.18 | 23.18 | 23.62 | 23.41 | 22.55 | 23.19 | 24.57 | 24.44 |
| AOA452GOK4 | RRAS    | RAS relat | 28.4  | 28.36 | 23.62 | NaN   | 26.2  | 26.28 | 26.88 | 26.53 |
| AOA452E8D3 | N/A     | Ig-like   | 26.15 | 26.2  | 23.63 | 23.53 | 24.98 | 25.38 | 25.33 | 25.17 |
| AOA452GAN5 | SET     | Uncharac  | NaN   | NaN   | 23.65 | 23.54 | NaN   | NaN   | NaN   | 22.58 |
| AOA452DTF4 | BASP1   | Brain at  | NaN   | NaN   | 23.66 | 23.72 | 22.91 | 22.8  | NaN   | NaN   |
| AOA452FSF6 | NRAS    | NRAS pro  | 26.38 | 26.6  | 23.68 | NaN   | 24.46 | NaN   | 26.32 | 25.52 |
| AOA452E294 | SOD2    | Superoxi  | 24.56 | 24.54 | 23.69 | 23.35 | NaN   | NaN   | NaN   | NaN   |
| AOA452F5L6 | CD177   | CD177 me  | 24.16 | 24.12 | 23.69 | 23.73 | 23.85 | 24.14 | 25.84 | 25.23 |
| AOA452E9T4 | LOC1021 | Uncharac  | 28.81 | 28.59 | 23.69 | 23.77 | 26.38 | 26.45 | 27.51 | 27.61 |
| AOA452FTL9 | VAPB    | VAMP ass  | 24.66 | 24.98 | 23.7  | 23.03 | NaN   | NaN   | 22.53 | 22.54 |
| AOA452DVS5 | N/A     | Protein   | 26.21 | 26.18 | 23.71 | 23.46 | NaN   | NaN   | 22.9  | 22.99 |
| Q32643     | MT-ATP8 | ATP synt  | 24.28 | 23.76 | 23.71 | 23.5  | NaN   | NaN   | NaN   | NaN   |
| AOA452EVW5 | SELENOM | Selenopr  | 24.51 | 24.94 | 23.71 | 23.45 | NaN   | NaN   | 24.26 | 23.95 |
| AOA452EHS0 | RBMX    | RRM dome  | 22.89 | NaN   | 23.72 | 24.26 | NaN   | NaN   | 23.38 | NaN   |
| AOA452FB40 | GLTP    | Glycolip  | 26.37 | 26.24 | 23.72 | 23.55 | 24.53 | 24.94 | 26.31 | 26.26 |
| AOA452EFK6 | ATP6AP2 | Uncharac  | 25.07 | 25.65 | 23.73 | 23.32 | 24.57 | 24.04 | 25.2  | 26.36 |

|            |         |           |       |       |       |       |       |       |       |       |
|------------|---------|-----------|-------|-------|-------|-------|-------|-------|-------|-------|
| AOA0U5ADC8 | N/A     | Kappa cε  | 22.53 | 22.34 | 23.73 | 23.68 | 23.39 | 23.35 | 23.78 | 23.62 |
| AOA452EYY1 | ARPC5   | Actin-rc  | 24.18 | 23.35 | 23.75 | 23.5  | NaN   | NaN   | 24.82 | 25.68 |
| AOA452EN63 | FGB     | Fibrinog  | 28.46 | 28.62 | 23.75 | 21.55 | 23.36 | 24.03 | 27.18 | 27.74 |
| AOA452EHK2 | NACA    | NAC-A/B   | 25.06 | 25.43 | 23.75 | 23.34 | 21.86 | NaN   | 22.9  | 23.56 |
| AOA452F602 | LOC1021 | Uncharac  | 21.89 | 21.87 | 23.76 | 23.87 | NaN   | 21.29 | NaN   | 21.59 |
| AOA452G2G1 | S100A4  | Protein   | 22.07 | 22.23 | 23.77 | 23.78 | NaN   | NaN   | NaN   | NaN   |
| AOA452FZP6 | ASRGL1  | Asparagi  | NaN   | NaN   | 23.78 | NaN   | NaN   | NaN   | 23.21 | NaN   |
| AOA452G5U6 | LOC1021 | Cytochrc  | 25.47 | 24.65 | 23.79 | 24.23 | NaN   | NaN   | 23.44 | NaN   |
| AOA452FLH1 | RAB7B   | RAB7B, n  | 27.27 | 26.86 | 23.8  | 23.05 | 24.44 | 25.01 | 26.85 | 27.02 |
| AOA452EB42 | VASP    | Vasodile  | 22.34 | NaN   | 23.82 | 23.95 | NaN   | NaN   | NaN   | NaN   |
| AOA452EAS2 | LOC1086 | SERPIN c  | NaN   | NaN   | 23.83 | 23.84 | 21.97 | 22.42 | NaN   | NaN   |
| AOA452FU62 | RPS17   | Uncharac  | 24.03 | 25.12 | 23.86 | 22.99 | NaN   | NaN   | NaN   | NaN   |
| AOA452EWU7 | MYDGF   | Myeloid   | 24.31 | 24.37 | 23.86 | 23.83 | 22.58 | NaN   | 23.58 | 23.57 |
| AOA452F5S1 | SVIP    | Small VC  | 23.48 | 23.17 | 23.86 | 23.67 | 24.11 | 24.11 | 23.21 | 23.18 |
| AOA452EWJ5 | EIF3A   | Eukaryot  | 25.65 | 24.8  | 23.87 | NaN   | NaN   | NaN   | NaN   | NaN   |
| AOA452E7J6 | CD14    | Monocyte  | 26.35 | 26.62 | 23.87 | 23.86 | 25.88 | 26.05 | 27.73 | 27.51 |
| AOA452FNY5 | SAR1B   | Secretic  | 28.34 | 28.45 | 23.9  | 24    | 25.11 | 25.38 | 27.34 | 27.31 |
| AOA452E9C0 | RPL17-C | RPL17-C1  | 28.13 | 28.08 | 23.91 | 24.09 | NaN   | NaN   | 22.31 | 22.69 |
| AOA452EH63 | ALDOA   | Fructose  | 28.39 | 28.24 | 23.92 | 24.03 | 21.43 | 23.81 | 26.86 | 27.11 |
| AOA452EK19 | YBX1    | CSD_1 dc  | 23.85 | 23.98 | 23.93 | 24.13 | NaN   | NaN   | NaN   | NaN   |
| AOA452F9F6 | SERPING | Serpin f  | NaN   | NaN   | 23.94 | 23.93 | 25.76 | 25.02 | NaN   | 22.61 |
| AOA452G0Y0 | PTP4A2  | Protein   | 27.07 | 26.7  | 23.94 | 24.27 | 24.71 | 25.04 | 26.26 | 26.16 |
| AOA452FVT4 | APOC4   | Uncharac  | 23.88 | 24.09 | 23.95 | 24.04 | 23.2  | 22.77 | 24.6  | 24.04 |
| AOA452GAX8 | NCSTN   | Nicastri  | 27.4  | 26.73 | 23.95 | 24.68 | 24.59 | 23.23 | 26.11 | 27.08 |
| AOA452G3B2 | SEC61B  | Protein   | 25.96 | 26.99 | 23.96 | 24.04 | NaN   | 23.79 | 25.88 | 25.37 |
| AOA452EB98 | LOC1086 | SERPIN c  | NaN   | NaN   | 23.97 | 23.96 | NaN   | NaN   | NaN   | NaN   |
| AOA452DME8 | SFN     | Stratifi  | 26.4  | 26.33 | 23.97 | 23.97 | 23.2  | 23.24 | 25.82 | 25.98 |
| AOA452DMN7 | LOC1086 | 40S ribc  | 27.32 | 27.69 | 23.98 | 23.84 | 20.22 | 20.76 | NaN   | 21.42 |
| AOA452DUH2 | ADAM10  | ADAM met  | 26.49 | 26.85 | 23.99 | 24.6  | 24.64 | 24.85 | 25.3  | 25.3  |
| AOA452FF94 | GLRX    | Glutarec  | 26.96 | 26.79 | 24    | 24.21 | 22.78 | NaN   | 25.57 | 25.55 |
| AOA452EUZ1 | GPI     | Glucose-  | 24.05 | 23.85 | 24.01 | 24.14 | 22.95 | 23.08 | 24.43 | 24.77 |
| AOA452FH78 | AHSG    | Alpha 2-  | 23.06 | 22.26 | 24.02 | 24.21 | 22.5  | 22.85 | 24.99 | 24.71 |
| AOA452EEG7 | LOC1021 | Uncharac  | 26.14 | 25.99 | 24.02 | 23.83 | NaN   | NaN   | 22.78 | 22.89 |
| AOA452E9L8 | N/A     | Ig-like   | 23.43 | 26.85 | 24.02 | 23.64 | 25.33 | 25.29 | 24.99 | NaN   |
| AOA452G3T1 | LMAN1   | Lectin,   | 28.96 | 28.84 | 24.03 | 23.9  | NaN   | NaN   | 26.4  | 26.06 |
| AOA452FPC2 | ACSL1   | Acyl-CoA  | 29.5  | 29.15 | 24.04 | 24.16 | 26.87 | 26.81 | 28.33 | 28.37 |
| AOA452F0H2 | ALYREF  | Aly/REF   | NaN   | 22.66 | 24.04 | 24.11 | NaN   | NaN   | NaN   | NaN   |
| AOA452DMW4 | RPL13   | 60S ribc  | 27.29 | 27.63 | 24.05 | 24.32 | NaN   | NaN   | 22.01 | 22.39 |
| AOA452FZ28 | TXNDC5  | Thioreduc | 27.13 | 27.67 | 24.05 | 24.36 | NaN   | NaN   | 24.95 | 25.47 |
| AOA452DVY2 | PLLP    | Plasmoli  | 27.93 | 28    | 24.06 | 23.71 | 23.49 | 23.6  | 24.26 | 26.45 |
| AOA452EAS1 | GNA11   | G protei  | 28.01 | 27.92 | 24.09 | 22.63 | 24.98 | 25.24 | 27.55 | 26.79 |
| AOA452EMZ1 | RPL36   | 60S ribc  | 25.58 | 25.67 | 24.1  | 23.43 | NaN   | NaN   | 23.21 | 23.06 |
| AOA452FHN5 | TPD52L2 | TPD52 li  | 25.96 | 26.1  | 24.12 | 24.3  | 24.12 | 23.92 | 25.84 | 25.49 |
| AOA452G9C5 | STUM    | Stum, mε  | 25.55 | 25.39 | 24.12 | 24.06 | 26.12 | 26.12 | 26.74 | 26.92 |
| AOA452F257 | MGP     | Matrix C  | NaN   | NaN   | 24.13 | 24.05 | 20.48 | 20.78 | NaN   | NaN   |
| AOA452E8Q8 | LOC1021 | Ribosome  | 26.48 | 26.63 | 24.13 | 24.19 | NaN   | NaN   | NaN   | 23.25 |
| AOA452DYG0 | TMED9   | GOLD don  | 27.35 | 27.1  | 24.14 | 24.13 | 22.43 | 22.17 | 23.69 | 24.57 |
| AOA452E481 | CNTFR   | Ciliary   | 26.03 | 26.1  | 24.15 | 23.89 | 25.74 | 26.32 | 26.99 | 27.04 |
| AOA452G9M1 | ENG     | Endoglr   | 27.88 | 27.16 | 24.15 | 23.85 | 25    | 25.37 | 26.81 | 26.93 |
| AOA452DTY2 | SLC25A5 | Uncharac  | 27.88 | 27.36 | 24.17 | 24.67 | NaN   | NaN   | 23.87 | 22.92 |

|            |         |          |       |       |       |       |       |       |       |       |
|------------|---------|----------|-------|-------|-------|-------|-------|-------|-------|-------|
| AOA452E2Q7 | JAM3    | Junction | 24.7  | 24.53 | 24.18 | 24.52 | 23.76 | 23.65 | 24.48 | 24.08 |
| Q9TV01     | PrP     | Major pr | 25.54 | 25.53 | 24.2  | 24.69 | 26.07 | 26.17 | 25.35 | 25.52 |
| AOA452F9L1 | RAB8B   | RAB8B, n | 26.96 | 26.91 | 24.23 | 24.71 | 24.87 | 24.8  | 26.35 | 26.21 |
| AOA452G9E6 | FOLR3   | Folate_r | 27.13 | 27.2  | 24.23 | 24.05 | 25.23 | 25.4  | 29.27 | 29    |
| AOA452ET55 | TPI1    | Trioseph | 23.41 | 24.82 | 24.24 | 23.37 | 21.55 | 21.8  | 25.98 | 25.44 |
| A5HEW3     | CYB5    | Cytochrc | 27.28 | 27.54 | 24.26 | 23.99 | 20.99 | NaN   | 25.62 | 24.89 |
| AOA452EJE8 | GNA13   | G protei | 28.79 | 28.54 | 24.26 | 23.11 | 26.83 | 26.53 | 27.89 | 27.64 |
| AOA452FX42 | RPS9    | Ribosome | 28.33 | 28.32 | 24.27 | 24.57 | NaN   | NaN   | 23.18 | 21.99 |
| AOA452EWC8 | SLC16A1 | MFS dom  | 28.33 | 27.99 | 24.29 | 24.5  | 24.47 | 24.93 | 26.88 | 26.94 |
| AOA452EJ02 | NPM1    | Uncharac | NaN   | NaN   | 24.31 | 24.75 | NaN   | NaN   | NaN   | NaN   |
| AOA452E047 | LOC1086 | Ig-like  | 27.09 | 26.87 | 24.31 | 24.37 | 22.98 | 22.85 | 25.38 | 25.43 |
| AOA0U5A2G6 | N/A     | Kappa cæ | NaN   | NaN   | 24.34 | 24.28 | 23.04 | 23.45 | NaN   | 22.55 |
| Q9XSL1     | csn1s2  | Alpha s2 | 23.42 | 23.75 | 24.34 | 24.61 | 23.35 | 23.16 | 25    | 25.01 |
| AOA452FLW9 | CD109   | CD109 mc | 28.46 | 28.12 | 24.35 | 24.74 | 25.63 | 25.49 | 29.67 | 29.56 |
| AOA452E972 | RPL24   | Ribosome | 25.3  | 25.3  | 24.35 | 24.21 | NaN   | NaN   | NaN   | 21.5  |
| AOA452ERN5 | CD82    | Tetraspæ | 25.21 | 25.15 | 24.35 | 24.39 | 24.36 | 24.33 | 24.03 | 23.39 |
| AOA2U8URJ6 | N/A     | Beta-caæ | NaN   | 22.06 | 24.35 | 24.48 | 25.12 | 24.23 | 26.48 | 25.57 |
| AOA452F069 | RPL18   | Ribosome | 27.96 | 27.9  | 24.35 | 25.09 | NaN   | 21.87 | 24.19 | 23.56 |
| AOA452FHV8 | CAP1    | Adenylyl | 25.34 | 25.7  | 24.37 | 23.95 | 21.71 | 21.52 | 24.73 | 24.73 |
| AOA452F0A8 | N/A     | 40S ribc | 24.57 | 24.51 | 24.37 | 24.55 | NaN   | NaN   | NaN   | NaN   |
| AOA452FXX0 | MDH2    | Malate c | 25.03 | 25.21 | 24.38 | 24.66 | NaN   | NaN   | 24.09 | 23.48 |
| AOA452DTL7 | SSR4    | Signal s | 29.45 | 29.35 | 24.39 | 24.34 | 21.82 | 21.6  | 26.89 | 26.57 |
| AOA452F4R6 | IDH1    | Isocitra | 29.6  | 29.77 | 24.4  | 24.37 | 25    | 23.7  | 26.85 | 27.18 |
| AOA452EM38 | TMED2   | GOLD don | 27.32 | 25.96 | 24.4  | 24.49 | NaN   | NaN   | 24.91 | 24.85 |
| AOA452FR97 | PGAM1   | Phosphog | 24.69 | 25.13 | 24.4  | 24.41 | 22.32 | 23.07 | 25.88 | 25.77 |
| AOA452E037 | MARCKS  | Myristoy | 26.73 | 26.41 | 24.43 | 24.38 | 23.96 | 24.75 | 26.15 | 26.17 |
| AOA452F4D3 | LOC1021 | Cystatir | 26.72 | 26.83 | 24.46 | 24.19 | NaN   | NaN   | 25.36 | 24.7  |
| AOA452F1F7 | RPLP2   | Ribosome | 29.45 | 29.2  | 24.48 | 24.66 | 20.47 | 21.23 | 30.36 | 30.27 |
| AOA452E7Q3 | TMPO    | Thymopoi | NaN   | NaN   | 24.49 | 24.56 | NaN   | NaN   | NaN   | NaN   |
| AOA452G724 | GDI2    | Rab GDP  | 29.55 | 29.81 | 24.5  | 24.89 | 26.4  | 26.28 | 27.86 | 27.92 |
| AOA452F4D1 | LOC1021 | Lipocln  | NaN   | NaN   | 24.51 | 24.67 | 26.57 | 26.47 | 22.46 | 22.36 |
| AOA452F333 | CDH1    | Cadherin | 24.22 | 23.68 | 24.51 | 24.81 | 23.78 | 24.13 | 24.42 | 24.14 |
| AOA452EX01 | ALDH3B2 | Aldehyde | 27.83 | 27.64 | 24.51 | 24.23 | 26.26 | 26.25 | 27.2  | 27.01 |
| AOA452F195 | SDCBP   | Syndecar | 23.61 | 23.66 | 24.52 | 24.54 | 24.01 | 24.15 | 25.14 | 25.15 |
| AOA452DXA6 | STEAP4  | STEAP4 n | 29.06 | 28.98 | 24.53 | 24.62 | 26.2  | 26.62 | 27.56 | 27.79 |
| AOA452DUC7 | LOC1021 | Uncharac | 25.08 | 25.22 | 24.53 | 24.71 | 23.07 | 23.49 | 25.33 | 25.18 |
| AOA452EAY9 | N/A     | Uncharac | 26.32 | 26.24 | 24.54 | 24.87 | NaN   | NaN   | 22.72 | 24.3  |
| AOA452G867 | KRAS    | KRAS pro | 28.38 | 28.34 | 24.55 | 24.96 | 26.05 | 25.98 | 27.32 | 26.93 |
| AOA452FAW4 | LBP     | Lipopoly | 26.12 | 26.35 | 24.55 | 24.8  | 25.76 | 25.6  | 27.25 | 27.16 |
| AOA452DYZ1 | LOC1086 | Peptidyl | 25.71 | 26.02 | 24.56 | 24.93 | 24.28 | 24.02 | 24.73 | 24.87 |
| AOA452FXC9 | F2      | Prothron | 24.21 | 24.22 | 24.57 | 24.89 | 25.01 | 25.03 | 27.01 | 27.01 |
| AOA452DQM6 | HSPD1   | Heat shc | 26.68 | 26.56 | 24.57 | 24.74 | NaN   | NaN   | 25.83 | 25.8  |
| AOA452F7J5 | MS4A3   | Uncharac | NaN   | NaN   | 24.58 | 24.91 | NaN   | NaN   | NaN   | 22.13 |
| AOA452FTM7 | SH3BGR  | SH3 dom  | 25.22 | 24.68 | 24.58 | 24.58 | 22.75 | NaN   | 24.96 | 24.97 |
| AOA452EU77 | PKM     | Pyruvate | 24.99 | 24.69 | 24.6  | 24.63 | 24.24 | 24.04 | 24.69 | 25.04 |
| AOA452EZ94 | RPS20   | Ribosome | 27.77 | 27.69 | 24.6  | 24.72 | 23.18 | 23.12 | 24.7  | 24.6  |
| AOA452FEZ7 | LOC1021 | Uncharac | 29.73 | 29.82 | 24.61 | 24.62 | 26.8  | 26.75 | 28.51 | 28.73 |
| AOA452FJF9 | TF      | Transfer | NaN   | NaN   | 24.63 | 24.6  | 25.02 | 25.23 | NaN   | NaN   |
| AOA452G9J7 | RPS7    | 40S ribc | 28.14 | 28.41 | 24.63 | 23.55 | 21.1  | NaN   | NaN   | NaN   |
| AOA452FTY4 | LOC1021 | Serum an | 24.82 | 24.78 | 24.66 | 24.36 | 24.94 | 24.81 | 24.97 | 25.01 |



|            |         |           |       |       |       |       |       |       |       |       |
|------------|---------|-----------|-------|-------|-------|-------|-------|-------|-------|-------|
| AOA452EI94 | MAP1B   | Microtub  | 24.11 | 24.32 | 24.69 | NaN   | NaN   | 24.23 | NaN   | 24.39 |
| AOA452EMEO | KRT14   | Keratin   | 22.4  | 22.35 | 24.71 | 24.14 | 22.01 | NaN   | NaN   | NaN   |
| AOA452EUX2 | PRDX6   | Thioredox | 26.95 | 26.78 | 24.72 | 25.29 | 24.28 | 24.52 | 25.3  | 24.9  |
| AOA452ENP8 | DNAJB11 | J domain  | 24.23 | 24.4  | 24.73 | 24.87 | 23    | 23.22 | 23.12 | 23.59 |
| AOA452DK35 | SRGN    | Serglyci  | 25.53 | 25.3  | 24.75 | 24.75 | 21.93 | NaN   | 25.96 | 26.15 |
| AOA452DM15 | CANX    | Calnexin  | 29.37 | 29.35 | 24.76 | 24.74 | 21.46 | 21.39 | 25.52 | 26.53 |
| AOA452F1S9 | N/A     | 40S ribo  | 24.77 | 25.24 | 24.77 | 24.69 | NaN   | NaN   | 22.96 | 23.1  |
| AOA452DTI8 | ATP6AP1 | ATPase I  | 22.91 | 23.08 | 24.79 | 24.62 | 21.98 | NaN   | 24.81 | 25.82 |
| AOA452ESB8 | ACTR3   | Uncharac  | 25.76 | 24.98 | 24.81 | 24.8  | 22.82 | 22.42 | 24.17 | 24.53 |
| AOA452F7F0 | SPCS3   | Signal p  | 26    | 25.56 | 24.84 | 24.13 | 23.84 | 23.95 | 24.81 | 25.41 |
| AOA452G1I8 | RPL26   | Ribosome  | 27.98 | 28.17 | 24.86 | 24.73 | 21.54 | 21.08 | 21.66 | 21.09 |
| AOA452DT47 | MYL6B   | Myosin I  | 25.84 | 25.37 | 24.86 | 24.68 | 20.71 | 20.99 | 25.46 | 25.51 |
| AOA452F5L1 | PRSS8   | Serine p  | 25.63 | 25.09 | 24.88 | 25.11 | 25.82 | 25.63 | 25.36 | 25.11 |
| AOA452EYJ1 | PEBP1   | Uncharac  | 27.35 | 27.26 | 24.9  | 24.61 | 24.74 | 23.35 | 26.05 | 26.47 |
| AOA452G9U0 | RAB35   | RAB35, n  | 29.33 | 28.81 | 24.92 | 25.78 | 27.3  | 27.37 | 27.86 | 27.91 |
| AOA452FA73 | RPL27   | 60S ribo  | 27.73 | 27.87 | 24.96 | 25.3  | NaN   | NaN   | 24.47 | 24.5  |
| Q5VI41     | ITGB2   | Integrin  | 26.28 | 26.18 | 24.96 | 25.13 | 23.19 | 23.45 | 25.81 | 25.93 |
| I1WI1      | RAP1B   | Ras-rela  | 27.64 | 27.59 | 24.98 | 24.46 | 25.57 | 25.61 | 27.24 | 27.04 |
| AOA452FNM9 | TMED10  | Transmen  | 27.86 | 27.45 | 25    | 24.74 | NaN   | NaN   | 24.23 | 23.93 |
| A9LM14     | RAB11B  | RAB11B    | 26.72 | 26.44 | 25.01 | 24.95 | 25.56 | 25.39 | 25.12 | 25.38 |
| AOA452FL64 | RETN    | Resistin  | 27.52 | 27.33 | 25.03 | 25.09 | 21.41 | 21.15 | 21.35 | 21.5  |
| AOA452EZ30 | LRG1    | Leucine   | 21.52 | 22.11 | 25.04 | 25.38 | 25.45 | 25.94 | 28.71 | 28.54 |
| AOA452F117 | N/A     | Ig-like   | 26.46 | 27.67 | 25.04 | 25.3  | 26.33 | 26.43 | 25.84 | 25.74 |
| AOA452EHN7 | LMNB1   | Lamin B1  | 24.81 | 24.82 | 25.05 | 25.29 | NaN   | NaN   | NaN   | NaN   |
| AOA452FPT0 | MARCKSL | MARCKS I  | 27.71 | 27.6  | 25.07 | 25.01 | 25.28 | 25.42 | 27.26 | 27.07 |
| AOA452G5D6 | PLSCR1  | Phosphol  | 26.17 | 26.06 | 25.07 | 24.85 | 27.4  | 27.8  | 26.4  | 26.73 |
| AOA452DTR7 | BGN     | Biglycan  | 29.59 | 29.18 | 25.11 | 26.13 | 26.61 | 26.57 | 30.46 | 30.34 |
| AOA452F6P6 | KRT8    | Keratin   | 26.53 | 26.65 | 25.12 | 25.3  | 24.87 | 22.91 | 22.91 | 23.82 |
| AOA452F7S2 | RAB25   | RAB25, n  | 29.05 | 29.02 | 25.12 | 25.04 | 24.85 | 24.88 | 26.48 | 26.15 |
| AOA452E480 | LDHB    | L-lactat  | 24.67 | 25.1  | 25.12 | 24.7  | 22.63 | 22.13 | 25.62 | 25.49 |
| AOA452FBH0 | BSG     | Uncharac  | 28.34 | 28.22 | 25.13 | 25.29 | 25.35 | 25.25 | 27.44 | 27.09 |
| AOA452ETA1 | YWHAB   | Tyrosine  | 28.14 | 28.03 | 25.16 | 25.06 | 23.83 | 24.04 | 27.39 | 27.66 |
| AOA452ETK3 | TPD52   | Uncharac  | 26.25 | 26.35 | 25.18 | 25.27 | 24.63 | 24.54 | 26.15 | 25.96 |
| AOA452FS72 | YWHAE   | 14_3_3 c  | 28.52 | 28.19 | 25.2  | 24.86 | 24.33 | 24.49 | 27.8  | 27.58 |
| AOA452DVP7 | LCP1    | Lymphocy  | 22.8  | 22.74 | 25.2  | 25.73 | 23.37 | 23.71 | 25.24 | 23.74 |
| AOA452FD52 | PDIA4   | Protein   | 28.3  | 28.39 | 25.21 | 25.78 | 21.7  | 21.4  | 27.47 | 27.56 |
| AOA452FYY3 | APOA2   | Apolipor  | 25.25 | 27.19 | 25.23 | 25.31 | 25.05 | 25.07 | 28.52 | 27.24 |
| AOA452G5R6 | LOC1021 | Uncharac  | 27.05 | 27.21 | 25.25 | 25.31 | 24.86 | 24.79 | 27.89 | 27.95 |
| AOA452E3D3 | PLIN4   | Perilipi  | NaN   | 24.23 | 25.28 | 25.46 | 24.83 | 24.69 | 26.05 | 26.08 |
| AOA452E1U8 | GNAI2   | G protei  | 28.99 | 28.91 | 25.29 | 24.96 | 26.9  | 26.85 | 27.92 | 27.95 |
| AOA452EIH8 | NUCB1   | Nucleobi  | 19.53 | 19.71 | 25.31 | 25.36 | 20.65 | 21.22 | 26.57 | 26.47 |
| AOA452FJM9 | ACSL3   | Acyl-CoA  | 29.22 | 28.89 | 25.33 | 25.37 | 27.07 | 27.01 | 28.41 | 28.17 |
| AOA452EQ33 | CHMP4B  | Charged   | 26.57 | 27.18 | 25.34 | 25.5  | NaN   | 23.52 | 25.94 | 25.75 |
| AOA452FFI1 | EHD1    | Uncharac  | 29.1  | 28.66 | 25.37 | 24.99 | 25.32 | 25.46 | 26.99 | 27.18 |
| AOA452EK18 | ITGAM   | Integrin  | 25.28 | 24.97 | 25.37 | 25.58 | 22.23 | NaN   | 25.16 | 25.4  |
| AOA452E8V5 | EEF1D   | Uncharac  | 28.19 | 28.12 | 25.37 | 25.4  | NaN   | NaN   | 26.01 | 25.71 |
| AOA452EA05 | AGR2    | Anterior  | 26.82 | 26.23 | 25.38 | 26.06 | 25.18 | 25.73 | 26.15 | 26    |
| AOA452ETY3 | GNG5    | Guanine   | 27.96 | 28.21 | 25.45 | 25.47 | 26.26 | 26.68 | 26.53 | 26.45 |
| AOA452E455 | LOC1021 | Uncharac  | 26.26 | 26.22 | 25.46 | 25.97 | 28.64 | 28.63 | 27.97 | 27.74 |
| AOA452G2C1 | TMBIM1  | Transmen  | 26.84 | 26.92 | 25.46 | 25.5  | 24.49 | 24.75 | 26.11 | 25.96 |

|            |         |          |       |       |       |       |       |       |       |       |
|------------|---------|----------|-------|-------|-------|-------|-------|-------|-------|-------|
| AOA452E7B9 | ACTN4   | Actinin  | 26.33 | 26.06 | 25.48 | 24.48 | 20.94 | 21.79 | 23.23 | 23.29 |
| AOA452F0B7 | MPO     | Uncharac | 25.16 | 24.88 | 25.49 | 25.75 | 21.74 | NaN   | 25.11 | 24.61 |
| AOA452E6P7 | CHMP2A  | Charged  | 27.14 | 27.34 | 25.5  | 25.6  | 23.34 | 23.67 | 26.06 | 25.72 |
| AOA452EWE8 | CAPNS1  | Calpain  | 27.34 | 27.02 | 25.51 | 25.69 | 22.9  | 21.75 | 27.05 | 27.15 |
| AOA452EP46 | RPL6    | 60S ribc | 28.34 | 29.2  | 25.51 | 24.57 | 21.99 | NaN   | 24.86 | 24.92 |
| AOA452EF34 | VAMP3   | Vesicle  | 25.65 | 25.81 | 25.51 | 25.77 | 24.31 | 24.51 | 25.2  | 25.43 |
| AOA452EOL3 | LOC1021 | Ribosome | 28.48 | 28.46 | 25.54 | 26.37 | 20.28 | 21.28 | 20.37 | NaN   |
| AOA452EGE3 | LOC1021 | Uncharac | NaN   | NaN   | 25.54 | 25.54 | 27.3  | 27.26 | NaN   | NaN   |
| AOA452ERK1 | GNG12   | Guanine  | 29.38 | 29.6  | 25.55 | 26.06 | 27.81 | 27.62 | 27.81 | 27.98 |
| AOA452FNC0 | SCCPDH  | Saccharc | 29.12 | 29.26 | 25.55 | 25.81 | 27.37 | 27.37 | 28.02 | 28.12 |
| AOA452DLZ9 | HEBP1   | Heme bir | 28.43 | 28.4  | 25.56 | 25.61 | 25.91 | 26.03 | 28.05 | 28.12 |
| AOA452FSN2 | UXS1    | Uncharac | 27.02 | 27.1  | 25.59 | 25.48 | 25.24 | 25.66 | 27.46 | 27.17 |
| AOA452DS03 | LOC1086 | Uncharac | 29.59 | 29.57 | 25.64 | 25.99 | 27.81 | 27.86 | 28.6  | 28.56 |
| AOA452FSE1 | RPS13   | Ribosome | 28.46 | 28.52 | 25.66 | 25.68 | 21.35 | 21.93 | 24.07 | 23.88 |
| AOA452FJ33 | CD44    | CD44 mol | 21.82 | 22.57 | 25.67 | 25.93 | NaN   | 21.21 | 23.6  | NaN   |
| AOA452E104 | PGK1    | Phosphog | 28.21 | 27.68 | 25.68 | 25.79 | 23.49 | 24.95 | 28.7  | 28.81 |
| AOA452EMK0 | EFHD2   | EF-hand  | NaN   | NaN   | 25.68 | 25.74 | NaN   | NaN   | NaN   | NaN   |
| AOA452ENM8 | WRN     | WRN RecG | 23.96 | 21.48 | 25.7  | 25.65 | 26.37 | 26.26 | 25.94 | 25.89 |
| AOA452DXW0 | DHRS1   | Dehydrog | 30.03 | 29.9  | 25.71 | 25.92 | 27.39 | 27.23 | 28.31 | 28.4  |
| AOA452DPW0 | CHI3L1  | Chitinas | 27.15 | 27.1  | 25.72 | 25.54 | 26.78 | 26.76 | 28.07 | 27.99 |
| AOA452EBJ3 | RPS3    | Ribosome | 30    | 30.02 | 25.73 | 25.25 | 24.64 | 23.92 | 25.92 | 26.22 |
| AOA452FSZ2 | DNAJC3  | DnaJ hea | 28.11 | 28.05 | 25.74 | 25.9  | 24.75 | 24.42 | 27.54 | 27.45 |
| AOA452DW39 | N/A     | 60S ribc | 23.68 | 24.8  | 25.8  | 25.84 | NaN   | NaN   | NaN   | NaN   |
| AOA452FNJ2 | HNRNPA2 | Heteroge | 23.28 | 23.12 | 25.82 | 25.88 | NaN   | 20.84 | 22.1  | 22.37 |
| AOA452FVD3 | RAC1    | Rac fami | 28.16 | 28.23 | 25.84 | 26.25 | 27.17 | 27.1  | 27.91 | 27.98 |
| AOA452FKN8 | TKT     | Transket | 29.83 | 29.56 | 25.85 | 25.49 | 26.13 | 26.27 | 28.6  | 28.49 |
| AOA452G2R8 | RAB5A   | Uncharac | 28.33 | 28.26 | 25.87 | 25.78 | 26.91 | 26.99 | 26.61 | 26.79 |
| A5JST4     | RPS10   | Ribosome | 27.61 | 27.66 | 25.87 | 25.84 | 21.62 | NaN   | 22.55 | NaN   |
| E9NRZ3     | B4GALT1 | Beta-1,4 | 26.59 | 26.95 | 25.88 | 25.94 | 26.92 | 26.89 | 27.54 | 27.47 |
| AOA452FSD4 | RPS15   | Uncharac | 27.26 | 27.18 | 25.9  | 25.49 | NaN   | NaN   | NaN   | NaN   |
| AOA452EXQ4 | STX3    | Syntaxir | 28.79 | 28.77 | 25.94 | 25.94 | 26.47 | 26.42 | 27.68 | 27.56 |
| AOA452EN82 | ATP5F1A | ATP synt | 28.81 | 29.69 | 25.96 | 26.16 | 22.39 | 21.63 | 26.56 | 26.34 |
| AOA452F116 | HYOU1   | Hypoxia  | 28.06 | 28.27 | 25.96 | 25.9  | 23.15 | 24    | 26.7  | 26.63 |
| AOA452FJW1 | SSR1    | Signal s | 28.35 | 28.04 | 25.98 | 25.7  | NaN   | 21.49 | 24.74 | 24.13 |
| AOA452FT08 | N/A     | Uncharac | 26.04 | 26.8  | 25.99 | 25.94 | 21.91 | 21.86 | 23.26 | 23.4  |
| AOA452FKL3 | SDS     | Serine c | 27.67 | 27.78 | 26    | 25.92 | 24.65 | 24.75 | 27.87 | 28.08 |
| AOA452DY90 | CD151   | Tetraspa | 27.24 | 27.25 | 26.01 | 26.19 | 26.4  | 26.39 | 27.62 | 27.43 |
| AOA452FMZ7 | HSP90AA | Heat shc | 27.84 | 27.94 | 26.01 | 25.72 | 21.27 | 22.65 | 26.36 | 26.15 |
| AOA452F0K7 | TPM3    | Tropomyc | 26.62 | 26.57 | 26.02 | 25.88 | NaN   | NaN   | 25.32 | 25.4  |
| AOA452FAH1 | CKAP4   | Cytoskel | 27.9  | 27.77 | 26.03 | 25.83 | NaN   | NaN   | 24.18 | 23.83 |
| AOA452EHC3 | RALA    | RAS like | 28.77 | 28.82 | 26.03 | 26.11 | 26.61 | 26.59 | 28.82 | 28.58 |
| AOA452G1I9 | EHD4    | EH domai | 29.6  | 29.57 | 26.03 | 26.1  | 27.68 | 27.72 | 28.71 | 28.58 |
| AOA452ER34 | RAB1B   | RAB1B, n | 28.55 | 28.06 | 26.03 | 25.74 | 26.61 | 26.57 | 27.4  | 27.16 |
| Q6T5B8     | MSTN    | Growth/c | 25.25 | 25.62 | 26.08 | 26.13 | 27.09 | 26.96 | 25.41 | 25.33 |
| D6PX62     | Crisp3  | Cysteine | 27.17 | 26.84 | 26.09 | 26.45 | 27.84 | 27.99 | 27.42 | 27.69 |
| AOA452DSV0 | HSD17B7 | Hydroxys | 29.72 | 29.67 | 26.1  | 26.03 | 28.04 | 28.16 | 28.71 | 28.63 |
| AOA452DQP6 | ACTC1   | Actin al | 29.39 | 29.6  | 26.11 | 26.15 | 25.09 | 25.67 | 27.26 | 27.37 |
| AOA452F327 | HSP90AB | Heat shc | 29.52 | 29.56 | 26.12 | 26.36 | NaN   | 23.31 | 26.75 | 26.43 |
| AOA452G3C9 | CALU    | Calumeni | 27.13 | 27.13 | 26.12 | 26.13 | NaN   | NaN   | 26.4  | 26.38 |
| AOA452DUB7 | PTHLH   | Uncharac | 26.15 | 26.52 | 26.14 | 26.07 | 26.24 | 26.83 | 25.67 | 25.02 |

|             |           |                                    |       |       |       |       |       |       |       |       |
|-------------|-----------|------------------------------------|-------|-------|-------|-------|-------|-------|-------|-------|
| Q0GC71      | TLR2      | Toll-like                          | 29.68 | 29.73 | 26.14 | 26.32 | 27.23 | 27.3  | 28.7  | 28.76 |
| AOA452EPC6  | N/A       | Uncharacterized                    | 29.66 | 29.78 | 26.17 | 26.34 | 27    | 26.81 | 29    | 29.06 |
| AOA452DVG8  | PDIA6     | Protein disulf                     | 28.08 | 28.15 | 26.17 | 26.32 | 24.31 | 24.58 | 27.56 | 27.52 |
| AOA452F3Z8  | TPD52L1   | TPD52-like                         | 28.07 | 27.69 | 26.17 | 25.97 | 25.34 | 25.56 | 26.83 | 27.12 |
| AOA452ERR1  | TMEM263   | Transmembrane                      | 28.08 | 27.88 | 26.17 | 26.16 | 26.72 | 26.69 | 29.15 | 29.07 |
| AOA452G7G8  | JCHAIN    | Joining chain                      | 26.86 | 26.88 | 26.21 | 26.21 | 26.23 | 26.65 | 27.78 | 27.74 |
| AOA452DYPD4 | LOC102111 | Uncharacterized                    | 29.17 | 29.5  | 26.24 | 26.35 | 27.24 | 27.1  | 28.71 | 27.65 |
| AOA452E7H3  | LOC102111 | H15 domain                         | 24.9  | 24.74 | 26.27 | 25.53 | NaN   | 23.2  | NaN   | 24.21 |
| AOA097C2Z1  | YWHAZ     | Tyrosine phosphatase               | 28.93 | 28.99 | 26.28 | 25.88 | 24.61 | 24.41 | 28.18 | 28.1  |
| AOA452F854  | LOC102111 | SERPINC1                           | 22.27 | NaN   | 26.28 | 26.04 | 25.27 | 26.16 | 23.62 | 22.73 |
| P18626      | CSN1S1    | Alpha-S1                           | NaN   | 22.27 | 26.32 | 26.69 | 25.76 | 25.75 | 25.72 | 25.49 |
| AOA452EHI7  | N/A       | Uncharacterized                    | 28.86 | 28.29 | 26.33 | 25.53 | 27.1  | 27.52 | 28.42 | 28.24 |
| AOA452G0B8  | OS9       | OS9 endonuclease                   | 28.05 | 28.03 | 26.33 | 26.25 | 23.35 | 23.3  | 27.89 | 28.03 |
| AOA452FHI3  | REEP5     | Receptor                           | 26.17 | 26.47 | 26.36 | 26.46 | 21.49 | 21.38 | 24.04 | 24.58 |
| AOA452ESU7  | HSPB1     | Heat shock protein                 | 26.3  | 26.28 | 26.38 | 26.55 | 25.47 | 25.57 | 26.39 | 26.41 |
| AOA452DSB1  | ANXA2     | Annexin                            | 29.16 | 29.16 | 26.41 | 26.43 | 27.1  | 27.1  | 29.01 | 28.93 |
| AOA452E1B3  | SIL1      | SIL1 nucleosome                    | 25.51 | 25.66 | 26.43 | 26.43 | 26.21 | 26.45 | 27.24 | 27.47 |
| Q06B57      | FASN      | Fatty acid synthase                | 30.34 | 30.22 | 26.43 | 26.39 | 27.55 | 27.66 | 29.17 | 29.09 |
| AOA452E3K5  | HIST2H2   | Histone H2                         | NaN   | NaN   | 26.44 | 28.19 | NaN   | 23.39 | NaN   | NaN   |
| AOA452E3Q7  | RAB5B     | RAB5B, non-muscle                  | 28.36 | 28.63 | 26.45 | 26.61 | 27.59 | 27.37 | 28.04 | 27.5  |
| AOA452EU55  | GNG5      | Guanine nucleotide-binding protein | 26.12 | 25.95 | 26.46 | 26.7  | 24.92 | 25.12 | 26.67 | 26.47 |
| AOA452F1W3  | THBS1     | Thrombospondin                     | 26.14 | 26.15 | 26.46 | 26.41 | 25.76 | 25.89 | 27.3  | 27.38 |
| AOA452E0H4  | MYL12B    | Myosin 12                          | 26.49 | 26.02 | 26.47 | 26.31 | NaN   | 23.14 | 26.02 | 25.95 |
| AOA452DS67  | HIST2H2   | Histone H2                         | NaN   | NaN   | 26.49 | 25.64 | NaN   | NaN   | NaN   | NaN   |
| AOA452FHR6  | SLC6A14   | Transporter                        | 28.93 | 28.9  | 26.51 | 26.05 | 26.75 | 26.47 | 28.71 | 28.33 |
| AOA452E3I1  | LOC10651  | Histone H2                         | NaN   | NaN   | 26.53 | 26.54 | NaN   | NaN   | NaN   | NaN   |
| A9LM13      | rab14     | RAB14                              | 29.27 | 28.97 | 26.53 | 26.55 | 27.46 | 27.3  | 27.92 | 27.96 |
| AOA452FP90  | GANAB     | Glucosyltransferase                | 27.97 | 27.83 | 26.54 | 26.71 | 26.64 | 26.68 | 28.22 | 27.9  |
| AOA452FGJ8  | DPP4      | Dipeptidyl peptidase               | 27.25 | 27.38 | 26.54 | 26.66 | 27.19 | 27.23 | 28.22 | 28.35 |
| AOA452F730  | SAR1A     | Secretory phospholipase            | 29.73 | 29.71 | 26.54 | 26.19 | 27.6  | 27.75 | 28.95 | 28.72 |
| AOA452E5I0  | HIST1H1   | Histone H1                         | 22.72 | 23.49 | 26.54 | 26.8  | 21.91 | NaN   | 23.42 | 23.65 |
| AOA452G9Y2  | ANXA4     | Annexin                            | 27.37 | 27.32 | 26.58 | 26.27 | 26.71 | 26.8  | 27.78 | 27.59 |
| AOA452E7B0  | LOC102111 | Arp2/3 complex                     | 26.53 | 26.37 | 26.6  | 24.9  | 23.02 | 23.03 | 23.68 | 24.41 |
| AOA452G587  | PFN1      | Profilin                           | 27.02 | 26.66 | 26.63 | 26.48 | 25.43 | 25.44 | 28.47 | 28.65 |
| AOA452F2C6  | EZR       | Ezrin                              | 28.33 | 28.43 | 26.63 | 26.93 | 25.93 | 25.98 | 27.38 | 27.52 |
| AOA452FHJ3  | GSN       | Gelsolin                           | 30.52 | 30.53 | 26.63 | 26.66 | 27.25 | 27.37 | 29.34 | 29.36 |
| AOA452EC18  | HIST1H1   | Histone H1                         | NaN   | 21.21 | 26.63 | 25.83 | NaN   | NaN   | NaN   | NaN   |
| AOA452G899  | DNAJC5    | J domain-containing                | 27.41 | 27.43 | 26.65 | 26.43 | 27.32 | 27.28 | 27.93 | 27.89 |
| AOA452DZE7  | S100A11   | Protein                            | 26.15 | 26.67 | 26.66 | 26.18 | NaN   | 23.97 | 26.48 | 25.59 |
| AOA452E4U4  | NT5E      | 5'-nucleotidase                    | 29.81 | 29.72 | 26.7  | 26.54 | 28.09 | 28.15 | 29.66 | 29.41 |
| AOA452FVN5  | RPL31     | Uncharacterized                    | 28.46 | 28.05 | 26.7  | 26.62 | NaN   | NaN   | 23.9  | 23.93 |
| AOA452ECE5  | ERP29     | Endoplasmic reticulum              | 28.85 | 28.6  | 26.73 | 26.72 | 22.76 | 22.71 | 26.56 | 26.71 |
| AOA452ELY6  | NSDHL     | NAD(P)-dependent                   | 31.9  | 31.83 | 26.73 | 28.34 | 29.36 | 29.2  | 30.65 | 30.56 |
| AOA452F3L3  | AGPAT1    | 1-acylglycerol                     | 23.85 | NaN   | 26.74 | 26.89 | 25.8  | 25.59 | 25.96 | 25.84 |
| AOA452F449  | LOC102111 | Uncharacterized                    | 24.86 | 24.85 | 26.74 | 26.74 | 25.72 | 25.66 | 29.2  | 29.22 |
| AOA452EQX6  | DBI       | Diazepam-binding                   | 27.95 | 27.53 | 26.78 | 26.93 | 23.51 | 25.05 | 26.58 | 26.47 |
| AOA452FJ34  | H2AFY     | Core histone                       | 19.98 | 21.36 | 26.81 | 27.6  | NaN   | NaN   | 20.04 | 19.81 |
| AOA452FGW6  | N/A       | E2F_TDP                            | 29.61 | 29.7  | 26.82 | 26.86 | 24.04 | 26.68 | 28.97 | 28.93 |
| AOA452FYV6  | CFL1      | Cofilin                            | 28.73 | 28.6  | 26.83 | 26.65 | 25.89 | 25.79 | 27.6  | 27.49 |
| I1VE56      | RAB8A     | RAS oncogene                       | 29.89 | 29.89 | 26.89 | 26.84 | 27.85 | 27.65 | 28.22 | 28.26 |

|            |         |          |       |       |       |       |       |       |       |       |
|------------|---------|----------|-------|-------|-------|-------|-------|-------|-------|-------|
| AOA452FPP9 | CD47    | CD47 mol | 28.07 | 28.14 | 26.9  | 26.88 | 26.45 | 26.57 | 28.45 | 28.24 |
| AOA452E2H7 | EEF1A1  | Elongati | 30.97 | 30.89 | 26.9  | 26.82 | 27.61 | 27.49 | 29.02 | 28.86 |
| AOA452EHS7 | SDF4    | 45 kDa c | NaN   | NaN   | 26.9  | 27.17 | 19.59 | 19.46 | 19.59 | 19.82 |
| AOA452EWT8 | NLRP12  | NLR fami | 29.88 | 29.41 | 26.93 | 26.12 | 25.66 | 25.55 | 28.12 | 26.94 |
| AOA452FQC0 | LOC1021 | Uncharac | 27.36 | 27.4  | 26.99 | 27.29 | 25.33 | 25.31 | 28.39 | 28.44 |
| AOA452DVM2 | RAB10   | RAB10, n | 29.11 | 28.87 | 26.99 | 26.94 | 27.1  | 27.31 | 28.07 | 28.1  |
| AOA452F540 | HMGB1   | Uncharac | 24.95 | 24.92 | 27    | 27.14 | 22.51 | 20.79 | 24.92 | 24.63 |
| AOA452EEF1 | RAB5C   | Uncharac | 30.14 | 30.16 | 27    | 26.79 | 28.19 | 28    | 29.04 | 28.77 |
| AOA452F4L3 | FGA     | Fibrinog | 28    | 28.1  | 27.02 | 27.2  | 29.23 | 29.14 | 27.31 | 27.29 |
| AOA452FN53 | CHP1    | Calcinet | 31.33 | 31.25 | 27.05 | 27    | 26.26 | 26.61 | 31.3  | 31.43 |
| AOA452E2P1 | N/A     | Uncharac | 27.39 | 27.49 | 27.08 | 26.9  | 27.78 | 27.81 | 28.97 | 28.96 |
| AOA452EXL2 | VAMP8   | Vesicle  | 27.88 | 27.81 | 27.08 | 27.07 | 25.82 | 25.98 | 26.93 | 26.95 |
| AOA452G271 | RPS18   | 40S ribc | 29.14 | 28.92 | 27.09 | 26.75 | 23.69 | 23.95 | 25.83 | 26.32 |
| AOA452DZ35 | AZU1    | Azurocic | 26.55 | NaN   | 27.09 | 27.14 | 24.95 | 25.11 | NaN   | 24.55 |
| AOA452G9Q1 | YKT6    | Uncharac | 29.73 | 29.39 | 27.09 | 27.21 | 27.46 | 27.73 | 28.6  | 28.48 |
| AOA452DZU0 | LOC1021 | SERPIN c | NaN   | NaN   | 27.1  | 27.28 | 27.04 | 25.89 | 22.23 | 21.03 |
| AOA452E8X3 | ARHGDIB | Rho GDP  | 21.11 | NaN   | 27.11 | 26.91 | 22.92 | 22.19 | 23.07 | 22.87 |
| AOA452F4J2 | SDC4    | Syndecar | 26.6  | 26.66 | 27.13 | 26.99 | 25.59 | 25.8  | 26.82 | 26.83 |
| AOA452FKT0 | ANXA5   | Annexin  | 28.78 | 28.86 | 27.16 | 27.24 | 26.79 | 26.91 | 29.2  | 29.16 |
| AOA452ED08 | LRPAP1  | LDL rece | 26.78 | 27.62 | 27.18 | 27.01 | NaN   | 21.29 | 24.5  | 24.73 |
| AOA452E8W7 | ANXA3   | Annexin  | 28.16 | 27.96 | 27.19 | 27.14 | 25.85 | 25.83 | 28.72 | 28.8  |
| AOA452FXR8 | VNN2    | Vanin 2  | 27.06 | 27.01 | 27.23 | 27.54 | 28.52 | 28.65 | 28.64 | 28.3  |
| AOA452F8I7 | RALB    | RAS like | 30.09 | 29.98 | 27.28 | 27.35 | 27.19 | 27.23 | 28.58 | 28.62 |
| AOA452EZ43 | BPIFB1  | BPI folc | 29.64 | 29.78 | 27.29 | 27.53 | 30.08 | 29.83 | 30.78 | 30.6  |
| AOA452G8E9 | N/A     | Uncharac | NaN   | 26.32 | 27.29 | 26.27 | 23.81 | 23.87 | 25.99 | 25.25 |
| AOA452DX04 | N/A     | Peptidyl | 30.3  | 30.09 | 27.31 | 27.01 | 27.79 | 27.56 | 29.93 | 29.9  |
| AOA452E734 | CALM2   | Calmodul | 28.76 | 28.9  | 27.32 | 27.08 | 25.28 | 25.83 | 29.54 | 29.29 |
| AOA452DYR7 | CST3    | Cystatir | 25.47 | 25.56 | 27.32 | 26.69 | 27.36 | 27.28 | 27.08 | 27.17 |
| AOA452ED29 | PIGR    | Polymeri | 27.44 | 27.34 | 27.36 | 27.65 | 27.7  | 27.85 | 28.74 | 28.76 |
| AOA452F1G6 | RAP1A   | RAP1A, n | 30.54 | 30.5  | 27.41 | 27.27 | 28.26 | 28.34 | 29.8  | 29.69 |
| AOA452ENB6 | C9      | Complem  | 26.59 | 26.65 | 27.42 | 27.35 | 28.92 | 29.03 | 29.26 | 29.25 |
| AOA452G286 | N/A     | Uncharac | 28.94 | 28.77 | 27.46 | 27.57 | 24.76 | 24.77 | 25.72 | 25.68 |
| AOA452EGM8 | VAT1    | Vesicle  | 30.76 | 30.7  | 27.48 | 27.5  | 28.57 | 28.7  | 30.13 | 29.97 |
| AOA452FN24 | KRT3    | Keratin  | 20.94 | NaN   | 27.48 | 27.32 | 23.94 | 24.47 | 23.26 | 23.67 |
| AOA452E0H5 | CYB5R3  | NADH-cyt | 31.16 | 31.08 | 27.48 | 27.45 | 28.7  | 28.71 | 30.6  | 30.58 |
| P85170     | N/A     | Cathelic | 26.21 | 26.35 | 27.49 | 26.72 | 27.26 | 27    | 26.81 | 26.89 |
| AOA452F8V5 | ARF3    | ADP ribc | 31.09 | 30.77 | 27.51 | 27.9  | 29.51 | 29.4  | 29.18 | 29.23 |
| POCH25     | HBA1    | Hemoglot | 27.05 | 27.06 | 27.52 | 27.51 | 27.02 | 27.25 | 27.41 | 27.26 |
| AOA452EE69 | N/A     | Ig-like  | 27.77 | 27.59 | 27.52 | 27.48 | 28.27 | 28.37 | 29.61 | 29.42 |
| AOA452FCF9 | SFT2D2  | Vesicle  | 28    | 27.95 | 27.52 | 27.1  | 24.8  | 25.46 | 27.32 | 27.33 |
| AOA452E0U0 | CD81    | Tetraspe | 27.84 | 27.63 | 27.54 | 27.85 | 26.98 | 26.9  | 28.62 | 28.5  |
| AOA452E1G9 | HSP90B1 | Heat shc | 30.84 | 30.84 | 27.59 | 27.79 | 25.17 | 25.27 | 28.97 | 28.3  |
| AOA452EZ57 | GGT1    | Uncharac | 28.25 | 28.28 | 27.61 | 27.37 | 28.13 | 28.14 | 29.15 | 28.8  |
| AOA452G885 | KRT4    | Keratin  | 24.68 | 24.55 | 27.64 | 26.92 | 24.78 | 24.88 | NaN   | NaN   |
| AOA452FPK7 | LOC1021 | Serum an | 27.19 | 26.94 | 27.67 | 27.86 | 27.19 | 27.19 | 27.65 | 27.54 |
| AOA452EM11 | APOC3   | Apolipo  | 26.7  | 26.99 | 27.67 | 27.74 | 27.84 | 27.53 | 27.9  | 27.75 |
| AOA452ET78 | LOC1021 | SERPIN c | NaN   | NaN   | 27.69 | 27.63 | 24.77 | 24.67 | 21.66 | NaN   |
| AOA452E6V0 | HMGB2   | Uncharac | 27.35 | 27.24 | 27.73 | 27.82 | 24.57 | 23.77 | 26.39 | 26.37 |
| AOA452E573 | ATP5F1B | ATP synt | 30.34 | 30.37 | 27.76 | 27.69 | NaN   | 21.74 | 28.56 | 29.67 |
| AOA452DMR1 | RAB7A   | Uncharac | 31.14 | 31.12 | 27.76 | 27.75 | 28.98 | 28.87 | 30.36 | 30.28 |

|            |         |          |       |       |       |       |       |       |       |       |
|------------|---------|----------|-------|-------|-------|-------|-------|-------|-------|-------|
| AOA452EEM4 | PGLYRP1 | Peptidog | 30.93 | 30.77 | 27.8  | 27.47 | 27.72 | 28.25 | 29.14 | 29.16 |
| AOA452FTQ5 | H2AFV   | Histone  | NaN   | NaN   | 27.83 | 27.83 | 22.83 | 22.94 | 23.67 | 24.1  |
| AOA452E2R6 | LOC1021 | Uncharac | 28.63 | 28.45 | 27.83 | 28.08 | 28.23 | 28.52 | 28.27 | 28.57 |
| I1W1N0     | RAB2A   | Ras-rela | 31.26 | 31.2  | 27.86 | 27.82 | 28.58 | 28.51 | 30.1  | 30.18 |
| AOSWR1     | CSN3    | Kappa c  | 25.46 | 25.16 | 27.9  | 27.85 | 27.02 | 27.19 | 28.43 | 28.51 |
| AOA452FGY2 | LOC1086 | MHC_I-li | 30.3  | 30.35 | 27.93 | 28.13 | 29.82 | 30.15 | 30.73 | 30.83 |
| AOA452FNW6 | GAPDH   | Glycerol | 28.97 | 29.01 | 27.94 | 28.08 | 27.24 | 27.17 | 29.02 | 29.08 |
| AOA452FYB3 | KRT19   | Keratin  | 27.34 | 27.21 | 27.96 | 27.69 | 26.6  | 26.68 | 26.56 | 26.52 |
| AOA075VRE8 | CRBP1   | Cellular | 30.99 | 30.9  | 27.98 | 27.99 | 28.45 | 28.34 | 30.59 | 30.48 |
| AOA452FB52 | DNAJB9  | DnaJ he  | 28.3  | 28.15 | 28    | 27.85 | 26.21 | 26.7  | 26.63 | 26.25 |
| AOA452E364 | PIEZO2  | Piezo-ty | 30.92 | 30.95 | 28    | 28.13 | 26.13 | 26.16 | 29.49 | 29.59 |
| AOA452FWI2 | RAB6A   | RAB6A, n | 31    | 31.07 | 28.03 | 28.04 | 28.6  | 28.71 | 29.45 | 29.42 |
| AOA452FKB0 | HIST1H1 | Histone  | NaN   | 24.58 | 28.05 | 28.05 | 22.86 | 22.82 | NaN   | NaN   |
| AOA452EER2 | HIST2H2 | Histone  | 24.41 | 24.62 | 28.05 | 28.25 | 22.93 | 22.93 | 23.9  | 23.52 |
| AOA452G855 | P4HB    | Protein  | 31.2  | 31.22 | 28.05 | 27.99 | 25.89 | 25.95 | 29.82 | 29.76 |
| AOA452ED36 | BCAP31  | B cell r | 29.19 | 29.1  | 28.11 | 28.01 | 21.01 | NaN   | 26.28 | 25.83 |
| AOA452DZD6 | N/A     | Ig-like  | 29.97 | 29.87 | 28.12 | 28.22 | 29.57 | 29.29 | 28.9  | 28.71 |
| AOA452G1R9 | NUCB2   | PSEN1    | 26.8  | 26.57 | 28.12 | 28.31 | 21.38 | 22.57 | 28.48 | 28.42 |
| AOA452G7F5 | N/A     | SEA dom  | 29.03 | 29.09 | 28.21 | 28.43 | 27.8  | 27.49 | 28.31 | 28.01 |
| AOA452FK82 | ARHGDIA | Rho GDP  | 30.42 | 30.27 | 28.24 | 28.06 | 27.39 | 27.21 | 28.9  | 28.99 |
| AOA452EZT9 | XDH     | FAD-binc | 32.12 | 32.4  | 28.25 | 28.25 | 31.02 | 31.38 | 27.6  | 27.91 |
| AOA452FVV2 | CIDEA   | CIDE-N c | 33.05 | 32.75 | 28.29 | 28.14 | 30.18 | 30.25 | 31.29 | 31.2  |
| AOA452F2T3 | SLC28A3 | Sodium/r | 33.02 | 32.89 | 28.34 | 28.45 | 28.17 | 27.99 | 30.8  | 30.89 |
| AOA452EAJ1 | LOC1021 | Uncharac | 27.04 | 26.99 | 28.36 | 28.56 | 28.04 | 28.04 | 29.21 | 28.64 |
| AOA452DLS3 | TMEM109 | Transmen | 25.98 | 27.36 | 28.36 | 27.17 | 24.42 | NaN   | 26.37 | 25.14 |
| AOA452E9Y6 | LPO     | Lactoper | 29.45 | 29.44 | 28.37 | 28.55 | 29.8  | 29.68 | 31.1  | 31.11 |
| AOA452FAW1 | MYH9    | Myosin b | 27.38 | 27.04 | 28.37 | 28.38 | NaN   | NaN   | 24.81 | 24.89 |
| AOA452G3V5 | LPL     | Lipoprot | 31.14 | 30.88 | 28.37 | 28.27 | 28.76 | 28.87 | 31    | 31.32 |
| M4NBE4     | HSPA5   | Heat shc | 31.13 | 31.14 | 28.42 | 28.51 | 26.78 | 27.02 | 29.77 | 29.69 |
| AOA452DTY6 | SLC39A8 | Solute c | 29.59 | 30.38 | 28.47 | 28.41 | 27.6  | 27.53 | 29.15 | 28.55 |
| I1W1N3     | RAB18   | Ras-rela | 32.08 | 32.26 | 28.48 | 28.44 | 30.18 | 30.03 | 30.34 | 30.13 |
| AOA452FTJ0 | CALR    | Calretic | 30.93 | 30.95 | 28.55 | 28.53 | 23.47 | 24.8  | 29.51 | 29.54 |
| AOA452F9Y8 | PPIB    | Peptidyl | 28.35 | 28.14 | 28.55 | 28.48 | 27.26 | 27.35 | 29.06 | 28.96 |
| P82018     | CATHL2  | Cathelic | 23.93 | NaN   | 28.65 | 28.11 | 28.03 | 28.5  | 28.3  | 28.46 |
| AOA452DY37 | B2M     | Beta-2-n | 27.6  | 28.02 | 28.69 | 28.48 | 29.02 | 28.92 | 29.32 | 29.16 |
| AOA452F3X9 | PROM2   | Prominir | 30.91 | 30.93 | 28.79 | 28.84 | 29.74 | 29.68 | 30.8  | 30.7  |
| AOA452FVY9 | MUC15   | Mucin 15 | 29.52 | 29.58 | 28.82 | 28.83 | 29.48 | 29.25 | 29.9  | 29.82 |
| A9LM10     | N/A     | RAB1A    | 32.34 | 32.36 | 28.95 | 28.75 | 29.66 | 29.71 | 30.78 | 30.77 |
| AOA452ED43 | APOA4   | Apolipor | 27.42 | 27.12 | 28.98 | 29.15 | 28    | 28.12 | 30.52 | 30.5  |
| AOA452FXA9 | MELTF   | Melanotr | 32.74 | 32.88 | 28.99 | 28.98 | 29.8  | 29.77 | 32.56 | 32.54 |
| AOA452FE94 | VIM     | Vimentir | 28.92 | 28.91 | 29.01 | 29.09 | 24.64 | 24.65 | 27.08 | 27.11 |
| AOA452G9K5 | KRT1    | Keratin  | 26.27 | 26.52 | 29.02 | 28.99 | 27.48 | 27.09 | 26.09 | 25.86 |
| AOA452EBK8 | RAB11A  | RAB11A,  | 31.6  | 31.68 | 29.03 | 29.28 | 29.66 | 29.7  | 30.28 | 30.13 |
| AOA452E9N0 | STOM    | Stomatir | 34.64 | 34.67 | 29.03 | 29.3  | 30.44 | 30.56 | 32.37 | 32.28 |
| AOA452FHZ0 | LCN2    | Lipocali | 29.28 | 29.48 | 29.06 | 29.14 | 27.35 | 27.41 | 27.78 | 27.91 |
| AOA452E9L6 | HSD17B1 | Hydroxys | 30.87 | 30.03 | 29.07 | 29.16 | NaN   | 28.98 | 27.71 | 27.29 |
| AOA452DMF8 | KRT5    | Keratin  | 23.2  | 24    | 29.21 | 29.12 | 27.1  | 26.06 | 23.38 | 22.36 |
| AOA452F5G1 | SERPINB | Serpin f | 25.01 | 25.19 | 29.21 | 29.16 | 27.52 | 26.73 | 27.41 | 27.04 |
| AOA452ERT5 | SLC34A2 | Solute c | 31.58 | 31.57 | 29.29 | 29.39 | 29.57 | 29.67 | 30.98 | 30.79 |
| AOA452ES93 | SDC2    | Syndecar | 29.15 | 29.36 | 29.4  | 29.29 | 28.89 | 28.93 | 29.03 | 29.01 |

|            |         |          |       |       |       |       |       |       |       |       |
|------------|---------|----------|-------|-------|-------|-------|-------|-------|-------|-------|
| AOA452DXE2 | C3      | Compleme | 32.11 | 32.17 | 29.45 | 29.41 | 31    | 30.99 | 31.85 | 31.69 |
| Q865G0     | N/A     | Beta-act | 32.48 | 32.45 | 29.58 | 29.7  | 28.53 | 28.71 | 30.97 | 31.02 |
| AOA452F7K4 | ALB     | Serum al | 25.16 | NaN   | 29.65 | 30.01 | 29.89 | 30.42 | 25.47 | 24.52 |
| AOA452DUG3 | Synapto | Synaptos | 30.67 | 30.71 | 29.69 | 29.56 | 30.25 | 30.27 | 29.77 | 29.75 |
| AOA452G0P6 | KRT10   | Keratin  | 26.5  | 26.35 | 29.71 | 29.8  | 27.51 | 27.66 | 26.8  | 27.07 |
| AOA452FYQ9 | UBA52   | Ubiquiti | 31.15 | 31.05 | 29.75 | 29.74 | 28.76 | 28.77 | 29.57 | 29.4  |
| Q09GP3     | ABCG2   | ATP-binc | 33.87 | 33.8  | 29.77 | 29.76 | 31.15 | 31.22 | 32.55 | 32.46 |
| AOA452F0Q6 | N/A     | Uncharac | 32.4  | 32.33 | 29.77 | 29.87 | 30.44 | 30.64 | 31.77 | 31.67 |
| P82017     | map34-A | MAP34-A  | 30.42 | 30.32 | 29.93 | 30.09 | 29.55 | 29.53 | 31.71 | 31.64 |
| AOA452DYP4 | CD9     | Tetraspæ | 30.43 | 30.79 | 30.18 | 30.21 | 29.91 | 30.33 | 31    | 30.89 |
| AOA452FVG0 | PLIN3   | Perilipi | 31.86 | 31.98 | 30.28 | 30.31 | 31.26 | 31.26 | 32.35 | 32.27 |
| AOA452E2Y0 | LOC1021 | Clusteri | 31.99 | 31.88 | 30.32 | 30.13 | 29.54 | 29.26 | 32.85 | 32.75 |
| AOA452FL25 | APOE    | Apolipor | 30.11 | 30.22 | 30.34 | 30.16 | 31.53 | 31.5  | 31.44 | 31.44 |
| Q9XSQ9     | bac7.5  | Bac7.5 p | 28.46 | 28.57 | 30.45 | 30.36 | 28.24 | 28.16 | 29.37 | 29.09 |
| AOA452DM79 | HIST1H1 | Histone  | 25.8  | 25.55 | 30.57 | 30.71 | 24.33 | 23.46 | 26.73 | 27.03 |
| AOA452FMU8 | MUC1    | SEA domæ | 33.46 | 33.23 | 30.7  | 30.64 | 29.48 | 29.74 | 33.03 | 33.01 |
| Q9XSQ8     | map28   | MAP28 pr | 30.19 | 30.05 | 30.75 | 30.88 | 30.52 | 30.47 | 32.38 | 32.28 |
| Q29477     | LTF     | Lactotra | 32.55 | 32.55 | 30.86 | 30.83 | 31.62 | 31.6  | 33.31 | 33.28 |
| AOA452FG03 | ANXA1   | Annexin  | 31.72 | 31.8  | 31.03 | 30.92 | 30    | 30.15 | 32.47 | 32.43 |
| A1YZ34     | XHD     | Xanthine | 37.26 | 37.34 | 31.24 | 31.12 | 33.52 | 33.52 | 35.49 | 35.42 |
| A9YUB7     | OPN     | Osteopor | 27.01 | 27.19 | 31.39 | 31.66 | 29.69 | 29.8  | 31.73 | 31.71 |
| AOA452DXL6 | CCDC18  | Coiled-c | 27.1  | 27.19 | 31.53 | 29.93 | 29.62 | 29.49 | 31.02 | 30.7  |
| Q6S4N9     | H-FABP  | Fatty ac | 33.9  | 33.92 | 31.68 | 31.67 | 30.89 | 31    | 33.1  | 33.05 |
| M9TKR5     | ADFP    | Perilipi | 34.86 | 34.84 | 31.7  | 31.87 | 33.13 | 33.1  | 34.53 | 34.35 |
| AOA452G1U2 | CD36    | Uncharac | 32.82 | 32.89 | 31.86 | 31.97 | 32.21 | 32.31 | 33.34 | 33.28 |
| AOA452G893 | S100A8  | S100 cal | 27.57 | 27.22 | 31.88 | 31.66 | 28.69 | 28.96 | 30.43 | 30.32 |
| AOA452EXE8 | S100A9  | EF-hand  | 26.97 | 27.18 | 32.02 | 32.06 | 28.41 | 28.28 | 29.94 | 29.6  |
| AOA452FI14 | APOA1   | Uncharac | 31.57 | 31.42 | 32.11 | 32.05 | 30.28 | 30.37 | 33.18 | 33.05 |
| AOA452EDZ4 | S100A12 | Protein  | 28.6  | 28.34 | 32.17 | 32.23 | 30    | 29.79 | 30.38 | 30.01 |
| AOA452DT02 | LOC1021 | Histone  | 29.68 | 29.67 | 32.17 | 31.66 | 26.94 | 26.98 | 28.81 | 28.57 |
| AOA452DSE1 | HIST1H1 | Histone  | 29    | 28.99 | 32.59 | 32.6  | 27.38 | 27.39 | 29.27 | 29.24 |
| P85297     | MFGE8   | Lactadhe | 33.95 | 34.04 | 33.07 | 32.95 | 33.2  | 33.11 | 34.92 | 34.44 |
| AOA452E1V4 | LOC1021 | Histone  | 29.66 | 29.54 | 33.3  | 32.94 | 28.45 | 28.56 | 29.31 | 29.04 |
| AOA452ECD3 | LOC1008 | Serum an | 31.67 | 32.07 | 33.4  | 33.35 | 32.75 | 32.86 | 33.69 | 33.43 |
| AOA452ECD2 | H2AFX   | Histone  | 30.07 | 30.33 | 33.5  | 33.39 | 28.48 | 28.25 | 29.68 | 29.15 |
| P02756     | LGB     | Beta-lac | 30.9  | 30.77 | 33.85 | 34.19 | 34.67 | 34.75 | 33.76 | 33.62 |
| A3EY52     | BTN1A1  | Butyropf | 36.93 | 36.97 | 33.86 | 33.83 | 35.19 | 35.23 | 36.76 | 36.69 |
| A5JSR9     | N/A     | Serum an | 33.52 | 33.57 | 33.89 | 33.36 | 34.48 | 34.34 | 32.7  | 33.28 |
| AOA452DWU1 | LOC1065 | Histone  | 32.13 | 32.06 | 34.66 | 34.64 | 30.48 | 30.52 | 31.72 | 31.56 |
| AOA452EGX6 | GLYCAM1 | Glycosyl | 34.6  | 34.8  | 35.3  | 35.5  | 35.77 | 35.82 | 35.61 | 35.33 |
| P33049     | CSN1S2  | Alpha-S2 | 32.19 | 32.49 | 35.72 | 35.61 | 34.89 | 35.03 | 34.99 | 34.87 |
| P33048     | CSN2    | Beta-cas | 33.8  | 34.05 | 36    | 35.93 | 35.62 | 35.68 | 36.3  | 36.42 |
| AOA452E968 | CCT3    | T-comple | 26.15 | 26.36 | NaN   | NaN   | 19.38 | NaN   | NaN   | 20.06 |
| AOA452F5N4 | MTPN    | Myotropf | 21.89 | 21.74 | NaN   | 20.94 | 19.54 | NaN   | NaN   | NaN   |
| AOA452GAH3 | ATP1B3  | Sodium/p | 23.71 | 23.81 | NaN   | NaN   | 19.9  | 20.29 | 21.63 | 21.26 |
| AOA452EL91 | YARS    | Tyrosine | 26.17 | 25.83 | NaN   | NaN   | 20.24 | NaN   | 24.44 | 23.91 |
| AOA452FKE5 | LOC1021 | Uncharac | 29.64 | 29.86 | NaN   | 20.53 | 20.33 | 21.21 | 28.57 | 28.43 |
| AOA452DK32 | F10     | Coagulat | 26.31 | 26.26 | NaN   | NaN   | 20.47 | 21.02 | 24.89 | 24.75 |
| AOA452EJN6 | CRYAB   | Crystall | 22.66 | 21.25 | NaN   | NaN   | 20.52 | NaN   | NaN   | NaN   |
| AOA452EEL3 | MINPP1  | Multiple | NaN   | 20.91 | NaN   | NaN   | 20.78 | NaN   | 24.02 | 23.46 |

|            |         |           |       |       |     |       |       |       |       |       |
|------------|---------|-----------|-------|-------|-----|-------|-------|-------|-------|-------|
| AOA452EPV9 | MIEN1   | Migratio  | 23.22 | NaN   | NaN | NaN   | 20.83 | 20.93 | NaN   | NaN   |
| AOA452G9K3 |         | Solute c  | 23.67 | 23.82 | NaN | 20.19 | 20.84 | 21.03 | NaN   | NaN   |
| AOA452FL49 | N/A     | Ferritin  | NaN   | NaN   | NaN | NaN   | 20.87 | NaN   | 23.44 | 23.25 |
| AOA452ECJ5 | ADGRG2  | Adhesio   | 25.95 | 26.12 | NaN | NaN   | 20.98 | 21.2  | 27.25 | 26.81 |
| AOA452EF60 | CAV2    | Caveolin  | NaN   | NaN   | NaN | NaN   | 21.14 | 22.15 | NaN   | NaN   |
| AOA452G0J3 | TIMP2   | TIMP met  | 22.63 | 22.16 | NaN | NaN   | 21.35 | 22    | 22.99 | 22.84 |
| AOA452FRI6 | PITPNC1 | Phosphat  | 22.2  | 22.56 | NaN | NaN   | 21.38 | 21.56 | 22.18 | 22.29 |
| AOA452DL29 | OSBPL1A | Oxysterol | 22.24 | NaN   | NaN | NaN   | 21.48 | 21.32 | 21.67 | NaN   |
| AOA452FXU9 | ATP2B1  | Calcium-  | 25.6  | 25.6  | NaN | NaN   | 21.58 | 20.55 | 23.83 | 23.86 |
| AOA452DPB0 | RAB43   | RAB43, n  | 24.08 | 23.67 | NaN | NaN   | 21.6  | NaN   | NaN   | NaN   |
| AOA452EJ90 | LCAT    | Lecithin  | NaN   | NaN   | NaN | NaN   | 21.71 | NaN   | NaN   | 22.49 |
| AOA452FYT7 | SERINC5 | Serine i  | NaN   | NaN   | NaN | NaN   | 21.72 | NaN   | 21.85 | NaN   |
| AOA452E2I9 | SEC22B  | SEC22 hc  | 26.43 | 26.75 | NaN | 21.79 | 21.74 | NaN   | NaN   | NaN   |
| AOA452F7F4 | ZDHHC20 | Palmitoy  | 23.65 | 22.65 | NaN | NaN   | 21.77 | NaN   | 22.29 | 22.04 |
| AOA452EPF5 | PRKG2   | cGMP-dep  | NaN   | NaN   | NaN | NaN   | 21.79 | 21.3  | NaN   | NaN   |
| AOA452DM56 | C16H1or | Uncharac  | 22.24 | NaN   | NaN | NaN   | 21.88 | NaN   | 22.53 | 22.19 |
| AOA452DKZ3 | NAPG    | NSF att   | 25.3  | 24.88 | NaN | 20.37 | 21.95 | 21.46 | 23.24 | 21.92 |
| AOA452F2N0 | TMEM53  | Transmen  | 23.35 | 23.13 | NaN | NaN   | 21.95 | NaN   | 22.54 | NaN   |
| AOA452EYP8 | GPRC5B  | G protei  | 23.2  | 23.14 | NaN | 21.97 | 21.95 | 22.34 | 23.41 | 23.06 |
| AOA452DK53 | YES1    | Tyrosine  | 22.65 | 22.57 | NaN | NaN   | 21.97 | 21.88 | 22.79 | 22.71 |
| AOA452FXH6 | THY1    | Thy-1 ce  | NaN   | 22.03 | NaN | 21.04 | 22    | 22.92 | NaN   | NaN   |
| AOA452FVL9 | HPN     | Hepsin    | 25.36 | 25.17 | NaN | 21.84 | 22.08 | 22.34 | 24.72 | 24.74 |
| AOA452ES30 | HPRT1   | Hypoxant  | 24.75 | 24.05 | NaN | NaN   | 22.15 | 22.14 | 22.19 | 22.46 |
| AOA452F982 | NPC2    | NPC intr  | NaN   | NaN   | NaN | NaN   | 22.23 | 22.14 | NaN   | NaN   |
| AOA452FX35 | CTSA    | Carboxyl  | NaN   | NaN   | NaN | NaN   | 22.23 | 21.71 | 21.98 | NaN   |
| AOA452EN97 | ACACA   | Acetyl-C  | 28.13 | 27.44 | NaN | 22.69 | 22.23 | 21.9  | 24.52 | 24.68 |
| AOA452F1Q3 | NME1    | Nucleosi  | 24.92 | 24.5  | NaN | NaN   | 22.24 | NaN   | 23.81 | 23.13 |
| AOA452F5B5 | STXBP6  | Syntaxin  | 24.04 | 22.94 | NaN | NaN   | 22.26 | 22.47 | 23.8  | 23.46 |
| AOA452EVI1 | RAB6B   | RAB6B, n  | 24.65 | 24.49 | NaN | 21.44 | 22.28 | 22.34 | 22.73 | 22.69 |
| AOA452ERL0 | DNAJA1  | Uncharac  | 22.84 | 22.96 | NaN | NaN   | 22.29 | 22.49 | 23.05 | 23.07 |
| AOA452DP21 | FAM114A | Family v  | 25.31 | 24.52 | NaN | NaN   | 22.29 | 21.97 | 24.55 | 24.58 |
| AOA452FMB2 | SNX1    | Sorting   | 23.57 | 23.02 | NaN | NaN   | 22.3  | 22.26 | 22.86 | 23.77 |
| AOA452EE35 | SLC13A2 | Solute c  | 27.21 | 27.15 | NaN | NaN   | 22.31 | 22.76 | 25.11 | 24.74 |
| AOA452FNV6 | FAM114A | Family v  | 25.07 | 24.89 | NaN | NaN   | 22.36 | 23.33 | 23.4  | 23.88 |
| AOA452FSV8 | TMEM68  | Transmen  | 24.48 | 24.42 | NaN | NaN   | 22.39 | NaN   | 22.93 | NaN   |
| AOA452FJJ6 | FN1     | Fibronect | 26.83 | 26.74 | NaN | NaN   | 22.42 | 24.62 | 29.29 | 29.76 |
| AOA452EDB4 | ATP13A4 | Cation-t  | 25.16 | 23.92 | NaN | NaN   | 22.43 | 22.51 | 23.38 | NaN   |
| AOA452EBX4 | N/A     | WD_REPE   | NaN   | 24.58 | NaN | NaN   | 22.52 | 21.23 | 22.79 | NaN   |
| AOA452ESM5 | ALG5    | ALG5 dol  | 26.36 | 25.99 | NaN | 22.63 | 22.54 | 23.36 | 24.73 | 25.12 |
| AOA452E512 | ELMOD2  | ELMO don  | 24.59 | 24.51 | NaN | NaN   | 22.55 | 22.81 | 24.21 | 23.95 |
| AOA452DR48 | HRAS    | HRas pro  | 25.16 | 25.18 | NaN | NaN   | 22.57 | 22.96 | 23.8  | 23.74 |
| AOA452FDS3 | SPPL2A  | Signal p  | 24.03 | 24.16 | NaN | NaN   | 22.6  | 22.51 | 24.37 | 24.31 |
| AOA452EKB3 | N/A     | Uncharac  | 25.2  | 24.69 | NaN | NaN   | 22.61 | 21.88 | 24.55 | 24.52 |
| AOA452F8G0 | CREG1   | Cellular  | 22.53 | 22.15 | NaN | 20.72 | 22.62 | 23.17 | 22.69 | 22.96 |
| AOA452EE75 | EBAG9   | Receptor  | 21.68 | 21.41 | NaN | NaN   | 22.65 | 22.88 | NaN   | 22.02 |
| AOA452G2V7 | CROCC   | Ciliary   | NaN   | NaN   | NaN | NaN   | 22.69 | 22.85 | NaN   | NaN   |
| AOA452E1J1 | NCOR1   | Nuclear   | NaN   | NaN   | NaN | NaN   | 22.73 | 23.04 | NaN   | NaN   |
| AOA452FE38 | ATP6V1A | ATPase F  | 26.62 | 28.92 | NaN | NaN   | 22.77 | 22.88 | 24.76 | NaN   |
| AOA452DVX2 | MVP     | Major ve  | 27    | 27.23 | NaN | NaN   | 22.82 | NaN   | 23.36 | 22.42 |
| AOA452DL20 | TSPAN14 | Tetraspe  | 24.26 | 25.08 | NaN | 22.8  | 22.88 | 22.88 | 23.32 | 23.5  |

|            |         |           |       |       |     |       |       |       |       |       |
|------------|---------|-----------|-------|-------|-----|-------|-------|-------|-------|-------|
| AOA452FTE9 | GNAI1   | G protei  | 25.41 | 24.91 | NaN | NaN   | 22.91 | 23.16 | 23.8  | 23.24 |
| AOA452EKD2 | CCT4    | T-comple  | 25.38 | 25.24 | NaN | NaN   | 22.98 | 22.6  | NaN   | NaN   |
| AOA452DND2 | LOC1021 | VWFA don  | 22.63 | 22.73 | NaN | 20.6  | 22.99 | 23.04 | 23.75 | 24.3  |
| AOA452E3Y5 | CIB1    | Calcium   | 29.33 | 29.69 | NaN | NaN   | 23.01 | 25.46 | 28.89 | 29.01 |
| AOA452FH09 | GNA14   | G protei  | 23.68 | 23.3  | NaN | NaN   | 23.02 | 22.35 | 23.64 | 22.82 |
| AOA452DUL2 | RAB3A   | RAB3A, n  | 25.93 | 25.91 | NaN | NaN   | 23.13 | 22.92 | 24.02 | 24.63 |
| AOA452DXP9 | DHRS3   | Dehydrog  | 23.75 | 24.1  | NaN | NaN   | 23.2  | 23.62 | 24.15 | 23.81 |
| AOA452FH30 | DNASE1L | Deoxyrit  | 25.73 | 25.75 | NaN | 21.7  | 23.31 | 23.33 | 25.92 | 25.93 |
| AOA452F2N3 | ALDH1A1 | Aldehyde  | 27.65 | 27.93 | NaN | 22.09 | 23.32 | 22.07 | 26.51 | 26.09 |
| AOA452E5L3 | PTPRJ   | Protein   | 26.67 | 26.77 | NaN | 20.02 | 23.37 | 23.29 | 26.24 | 26.33 |
| AOA452DZM5 | PURA    | Purine r  | 22.85 | 23.99 | NaN | NaN   | 23.68 | NaN   | NaN   | NaN   |
| AOA452EER1 | LDAH    | Lipid dr  | 26.75 | 26.62 | NaN | NaN   | 23.74 | 24.24 | 25.84 | 25.7  |
| AOA452FR95 | CFB     | Uncharac  | 23.92 | 24.16 | NaN | 22.95 | 23.74 | 24.4  | 23.6  | 23.96 |
| AOA452DPV2 | LOC1021 | NAD(P) (+ | NaN   | 21.51 | NaN | NaN   | 23.79 | 23.64 | 22.64 | 21.96 |
| AOA452FJ48 | RRAS2   | RAS relat | 25.54 | 25.32 | NaN | NaN   | 23.81 | 24.28 | 24.78 | 24.57 |
| AOA452E3Y8 | TMC4    | Transmen  | 26.93 | 25.79 | NaN | NaN   | 23.84 | 23.55 | 24.55 | 24.63 |
| AOA452G5W9 | ALDH3B1 | Aldehyde  | 25.79 | 25.6  | NaN | NaN   | 23.94 | 24.41 | 25.49 | 25.18 |
| AOA452FT54 | GIPC2   | GIPC PD2  | 27.64 | 27.45 | NaN | NaN   | 24.05 | 24.62 | 26.23 | 26.28 |
| AOA452FGW9 | GPAT4   | Glycerol  | 25.95 | 25.99 | NaN | NaN   | 24.28 | 24.4  | 25.67 | 25.43 |
| AOA452G1U1 | PSEN1   | Presenil  | 25.97 | 25.74 | NaN | NaN   | 24.87 | NaN   | 25.21 | 25.45 |
| P68215     | FGA     | Fibrinog  | NaN   | NaN   | NaN | NaN   | 25.01 | 24.83 | NaN   | NaN   |
| AOA452EAZ8 | NDRG2   | NDRG fan  | 27.44 | 27.39 | NaN | NaN   | 25.27 | 25.46 | 26.83 | 26.72 |
| AOA452FNL9 | LYN     | Tyrosine  | 26.32 | 26.4  | NaN | NaN   | 25.42 | 25.63 | 26.1  | 26.09 |
| AOA452FNC1 | FAF2    | Fas assoc | 27.48 | 27.5  | NaN | NaN   | 25.53 | 25.56 | 26.81 | 26.56 |
| AOA452EW11 | C7      | Compleme  | 26.87 | 26.68 | NaN | NaN   | 25.66 | 25.43 | 27.28 | 27.25 |
| AOA452G282 | GNG7    | Guanine   | 26.42 | 26.2  | NaN | 25.03 | 25.91 | NaN   | 25.06 | 24.88 |
| AOA452EAH5 | ALPL    | Alkaline  | NaN   | 24.74 | NaN | 21.64 | 26.03 | 25.98 | 24.75 | 25.42 |
| AOA452DYG7 | LOC1021 | BPI1 don  | NaN   | NaN   | NaN | NaN   | 26.31 | 26.49 | 23.14 | 23.58 |
| AOA452E2C0 | TTR     | Transthy  | NaN   | NaN   | NaN | 21.86 | 26.37 | 26.91 | NaN   | 23.99 |
| U5SOD4     | Lifr    | Leukemi   | 22.45 | 22.4  | NaN | NaN   | NaN   | NaN   | NaN   | NaN   |
| Q9BG81     | SCD1    | Acyl-CoA  | 26.62 | 26.4  | NaN | NaN   | NaN   | NaN   | 23.9  | 24.23 |
| H9TKZ0     | tram1   | Transloc  | 24.34 | 24.69 | NaN | NaN   | NaN   | NaN   | NaN   | NaN   |
| AOA452FQY0 | CYP20A1 | Cytochrc  | 25.89 | 26.73 | NaN | NaN   | NaN   | NaN   | 25.31 | 23.17 |
| AOA452E2N1 | CYBRD1  | Cytochrc  | 24.78 | 24.54 | NaN | 21.74 | NaN   | NaN   | 23.66 | 22.93 |
| AOA452FJ43 | KDELRL  | ER lumer  | 24.39 | 24.25 | NaN | NaN   | NaN   | NaN   | 22.5  | 21.81 |
| AOA452FNZ7 | CAPN1   | Uncharac  | 22.84 | 22.44 | NaN | NaN   | NaN   | NaN   | 22.49 | NaN   |
| Q29430     | N/A     | Lysozyme  | 24.25 | 24.16 | NaN | NaN   | NaN   | NaN   | NaN   | NaN   |
| B9VR86     | PSMA6   | Proteasc  | 24.88 | 24.82 | NaN | NaN   | NaN   | NaN   | NaN   | NaN   |
| AOA452GBM7 | ERP44   | Endoplas  | 25.53 | 25.38 | NaN | NaN   | NaN   | NaN   | NaN   | 23.23 |
| AOA452GBJ0 | PDCD6IP | BRO1 don  | 23.28 | 23.39 | NaN | NaN   | NaN   | NaN   | 23.42 | 23.4  |
| AOA452GB99 | TAGLN2  | Transgel  | NaN   | NaN   | NaN | NaN   | NaN   | NaN   | 23.07 | 22.93 |
| AOA452GAU5 | LOC1021 | Uncharac  | 24.98 | 24.78 | NaN | NaN   | NaN   | NaN   | 25.14 | 25.03 |
| AOA452GAH2 | CS      | Citrate   | 22.33 | 22.35 | NaN | NaN   | NaN   | NaN   | NaN   | NaN   |
| AOA452GAF7 | HM13    | Histocon  | 24.86 | 24.95 | NaN | NaN   | NaN   | NaN   | NaN   | NaN   |
| AOA452GA70 | ADA     | Adenosir  | NaN   | NaN   | NaN | NaN   | NaN   | NaN   | 23.54 | 22.99 |
| AOA452G9Y1 | LOC1086 | SERPIN c  | 23.68 | 23.54 | NaN | NaN   | NaN   | NaN   | NaN   | NaN   |
| AOA452G967 | OSBPL9  | Oxysterc  | 20.71 | 20.8  | NaN | NaN   | NaN   | NaN   | NaN   | NaN   |
| AOA452G8R5 | SCAMP4  | Secretor  | 23.06 | 22.94 | NaN | NaN   | NaN   | NaN   | 21.62 | 21.5  |
| AOA452G8B2 | CYB5B   | Cytochrc  | 25.47 | 25.6  | NaN | 22.91 | NaN   | NaN   | 22.61 | NaN   |
| AOA452G7V1 | BSCL2   | BSCL2 li  | 28.19 | 28.32 | NaN | NaN   | NaN   | NaN   | 27.08 | 27.1  |



|            |         |                   |       |       |     |       |     |       |       |       |
|------------|---------|-------------------|-------|-------|-----|-------|-----|-------|-------|-------|
| AOA452G7N6 | S100A16 | Protein           | 24.88 | 25.03 | NaN | NaN   | NaN | NaN   | 23.49 | 23.93 |
| AOA452G7G7 | TMC01   | Calcium           | 24.61 | 24.42 | NaN | NaN   | NaN | NaN   | NaN   | 21.93 |
| AOA452G789 | IMMT    | MICOS c           | 21.96 | 21.98 | NaN | NaN   | NaN | NaN   | NaN   | NaN   |
| AOA452G776 | SRP54   | Signal r          | 23.53 | 23.21 | NaN | NaN   | NaN | NaN   | NaN   | NaN   |
| AOA452G6T9 | PSMD14  | MPN dom           | 23.93 | 23.42 | NaN | NaN   | NaN | NaN   | NaN   | NaN   |
| AOA452G684 | EMC1    | ER membr          | 23.5  | 23.7  | NaN | NaN   | NaN | NaN   | NaN   | NaN   |
| AOA452G5K1 | PACC1   | Proton $\epsilon$ | 22.86 | 22.9  | NaN | NaN   | NaN | NaN   | NaN   | NaN   |
| AOA452G5I4 | ARCNI   | Coatome           | 22.2  | 22.22 | NaN | NaN   | NaN | NaN   | NaN   | NaN   |
| AOA452G5G8 | DNM2    | Dynamini          | 21.86 | 21.77 | NaN | NaN   | NaN | NaN   | NaN   | NaN   |
| AOA452G5E3 | ATP5PD  | ATP synt          | 25.42 | 25.08 | NaN | NaN   | NaN | NaN   | NaN   | 24.48 |
| AOA452G572 | CLTC    | Clathrir          | 26.71 | 26.56 | NaN | NaN   | NaN | NaN   | NaN   | NaN   |
| AOA452G510 | VPS35   | Vacuolar          | 22.89 | 22.96 | NaN | NaN   | NaN | NaN   | 21.81 | 21.39 |
| AOA452G4T1 | CEMIP2  | Cell mig          | 23.17 | 23.44 | NaN | NaN   | NaN | NaN   | 22.94 | NaN   |
| AOA452G4D6 | CCT2    | Chaperor          | 24.68 | 26.54 | NaN | NaN   | NaN | NaN   | NaN   | 22.31 |
| AOA452G4A6 | PCMT1   | Protein-          | 22.56 | 22.75 | NaN | NaN   | NaN | NaN   | 22.4  | NaN   |
| AOA452G478 | N/A     | UBIQUIT           | 25.97 | 26.13 | NaN | NaN   | NaN | NaN   | NaN   | NaN   |
| AOA452G471 | MARVELD | MARVEL c          | 23.91 | 23.4  | NaN | NaN   | NaN | NaN   | NaN   | NaN   |
| AOA452G3Q4 | RPL18A  | 60S ribo          | 26.59 | 26.81 | NaN | NaN   | NaN | NaN   | NaN   | NaN   |
| AOA452G300 | PSMD12  | Proteasc          | 22.23 | 22.04 | NaN | NaN   | NaN | NaN   | NaN   | NaN   |
| AOA452G2Z1 | RPL3    | Uncharac          | 24.84 | 28.37 | NaN | NaN   | NaN | NaN   | 21.67 | 21.88 |
| AOA452G2T5 | DYNC1I2 | Dynein c          | 23.29 | 23.43 | NaN | NaN   | NaN | NaN   | NaN   | NaN   |
| AOA452G2S0 | EEF1E1  | GST C- $\epsilon$ | 25.69 | 25.67 | NaN | NaN   | NaN | NaN   | 24.42 | 23.87 |
| AOA452G2Q3 | GLUL    | Glutami           | 23.95 | 24.22 | NaN | NaN   | NaN | NaN   | NaN   | NaN   |
| AOA452G237 | ATP2A2  | Calcium-          | 23.9  | 23.64 | NaN | NaN   | NaN | NaN   | NaN   | NaN   |
| AOA452G1Z7 | SQLE    | Squalene          | 24.54 | 24.42 | NaN | NaN   | NaN | NaN   | NaN   | NaN   |
| AOA452G1Q5 | RPL10   | Ribosome          | 27.08 | 26.84 | NaN | NaN   | NaN | NaN   | NaN   | NaN   |
| AOA452G0Z5 | PFKP    | 6-phosph          | 23.07 | 22.97 | NaN | NaN   | NaN | NaN   | NaN   | NaN   |
| AOA452G0P9 | PARVA   | Parvin $\epsilon$ | 23.57 | 23.66 | NaN | NaN   | NaN | NaN   | NaN   | NaN   |
| AOA452G069 | WDR1    | WD repe           | 25.42 | 25.11 | NaN | 22.74 | NaN | NaN   | 23.73 | NaN   |
| AOA452G058 | ATP13A3 | Cation-t          | 22.82 | 22.71 | NaN | NaN   | NaN | NaN   | 21.81 | NaN   |
| AOA452FZZ9 | LOC1021 | Eukaryot          | 24.89 | 24.89 | NaN | NaN   | NaN | NaN   | NaN   | NaN   |
| AOA452FZT8 | SYNCRIP | Synaptot          | 24.79 | 25.21 | NaN | NaN   | NaN | NaN   | NaN   | NaN   |
| AOA452FZR8 | HTATIP2 | HIV-1 T           | NaN   | 22.66 | NaN | NaN   | NaN | NaN   | NaN   | 22.07 |
| AOA452FZL7 | ADGRF1  | Adhesior          | 22.34 | NaN   | NaN | NaN   | NaN | NaN   | 21.92 | NaN   |
| AOA452FZ94 | LOC1021 | Uncharac          | 25.56 | 25.53 | NaN | NaN   | NaN | NaN   | 24.78 | 24.5  |
| AOA452FZ49 | STT3A   | STT3 oli          | 26.11 | 26.92 | NaN | NaN   | NaN | NaN   | 23.01 | 23.18 |
| AOA452FYW6 | DYNC1H1 | Dynein c          | 23.82 | 23.9  | NaN | NaN   | NaN | NaN   | NaN   | NaN   |
| AOA452FYU0 | TLL1    | Metalloe          | 25.8  | 25.78 | NaN | NaN   | NaN | NaN   | 25.31 | 25.63 |
| AOA452FYD0 | ARL1    | ADP ribo          | 23.79 | 23.54 | NaN | NaN   | NaN | NaN   | NaN   | NaN   |
| AOA452FXS3 | DPM1    | Dolichol          | 23.85 | 23.65 | NaN | NaN   | NaN | NaN   | NaN   | NaN   |
| AOA452FXN5 | PAFAH1B | Platelet          | 24.33 | 24.39 | NaN | NaN   | NaN | NaN   | NaN   | NaN   |
| AOA452FXK1 | TOM1    | Target c          | 21.97 | 22.6  | NaN | NaN   | NaN | NaN   | NaN   | NaN   |
| AOA452FXJ0 | LOC1021 | RING-tyr          | NaN   | 22.79 | NaN | NaN   | NaN | NaN   | NaN   | 20.95 |
| AOA452FXD6 | CLIC1   | Chloride          | 21.04 | 20.88 | NaN | NaN   | NaN | NaN   | 23.78 | 23.28 |
| AOA452FWV7 | N/A     | Pribosyl          | 23.74 | 24.17 | NaN | NaN   | NaN | NaN   | NaN   | NaN   |
| AOA452FWR4 | RBBP9   | RB bindi          | 23.22 | 22.11 | NaN | NaN   | NaN | NaN   | NaN   | 21.46 |
| AOA452FWQ6 | OLA1    | Obg-like          | 23.06 | 22.7  | NaN | NaN   | NaN | NaN   | NaN   | NaN   |
| AOA452FVS4 | ACSS2   | Acyl-CoA          | 23.28 | 23.47 | NaN | NaN   | NaN | NaN   | NaN   | NaN   |
| AOA452FVM4 | WARS    | Tryptoph          | 28.06 | 27.95 | NaN | NaN   | NaN | 20.36 | 24.54 | 24.37 |
| AOA452FVJ4 | SYVN1   | Synoviol          | 23.02 | 22.43 | NaN | NaN   | NaN | NaN   | NaN   | NaN   |

|            |         |          |       |       |     |       |     |       |       |       |
|------------|---------|----------|-------|-------|-----|-------|-----|-------|-------|-------|
| AOA452FVJ2 | PABPC1  | Polyader | 24.39 | 24.65 | NaN | NaN   | NaN | NaN   | NaN   | NaN   |
| AOA452FVB0 | ARPC3   | Actin-re | 23.78 | 23.3  | NaN | 22.1  | NaN | NaN   | 22.45 | 22.07 |
| AOA452FU58 | ATP1B1  | Sodium/  | 25.09 | 25.13 | NaN | NaN   | NaN | NaN   | 23.3  | 23.61 |
| AOA452FU56 | N/A     | Flavodo  | 25.43 | 25.57 | NaN | NaN   | NaN | NaN   | NaN   | 21.26 |
| AOA452FU33 | SND1    | Staphyl  | 27.76 | 25.72 | NaN | NaN   | NaN | NaN   | 22.96 | NaN   |
| AOA452FTX0 | MPP5    | Membran  | 22.09 | 21.79 | NaN | NaN   | NaN | NaN   | NaN   | NaN   |
| AOA452FTU0 | MBLAC2  | Metallo  | 24.92 | 24.34 | NaN | NaN   | NaN | NaN   | 24.73 | NaN   |
| AOA452FTN4 | PSAT1   | Phospho  | 23.66 | 23.93 | NaN | NaN   | NaN | NaN   | 23.08 | 22.71 |
| AOA452FTH7 | LOC1021 | Anaphyl  | 26.98 | 26.88 | NaN | NaN   | NaN | NaN   | 25.17 | 25.4  |
| AOA452FTB6 | DNAJA2  | Uncharac | 25.19 | 24.62 | NaN | NaN   | NaN | NaN   | 23.36 | 23.59 |
| AOA452FSW6 | ESYT1   | Extende  | 22.6  | 22.19 | NaN | NaN   | NaN | NaN   | NaN   | NaN   |
| AOA452FSN3 | BMP1    | Metallo  | 24.16 | 24    | NaN | NaN   | NaN | NaN   | 23.97 | 23.9  |
| AOA452FSI1 | MESD    | Mesodern | NaN   | 21.64 | NaN | 21.83 | NaN | NaN   | NaN   | NaN   |
| AOA452FSB2 | MYO1C   | Myosin I | 22.08 | 21.93 | NaN | NaN   | NaN | NaN   | NaN   | NaN   |
| AOA452FRS6 | ATP6VOC | V-type   | 23.01 | 23.05 | NaN | NaN   | NaN | NaN   | NaN   | NaN   |
| AOA452FRQ4 | PON2    | Paraoxo  | 22.96 | 23.08 | NaN | NaN   | NaN | NaN   | 20.81 | NaN   |
| AOA452FRI5 | SH3YL1  | SH3 and  | 21.8  | 21.46 | NaN | NaN   | NaN | 20.52 | 21.37 | 21.57 |
| AOA452FRG8 | LOC1021 | ANK_REP  | NaN   | 21.09 | NaN | NaN   | NaN | NaN   | 20.41 | 21.28 |
| AOA452FR51 | CRB3    | Crumbs c | 22.6  | 22.77 | NaN | NaN   | NaN | NaN   | NaN   | 21.58 |
| AOA452FQY9 |         | AP compl | 22.38 | 21.91 | NaN | NaN   | NaN | NaN   | NaN   | NaN   |
| AOA452FQV1 | CCT7    | T-comple | 25.88 | 25.87 | NaN | NaN   | NaN | NaN   | 20.59 | 20.58 |
| AOA452FQM7 | ATP6V1E | ATPase I | 24.16 | 24.31 | NaN | 22.96 | NaN | NaN   | 23.91 | 23.9  |
| AOA452FPP6 | FARSA   | Phenylal | 22.96 | 22.78 | NaN | NaN   | NaN | NaN   | NaN   | NaN   |
| AOA452FPD6 | SEL1L   | SEL1L ac | 27.09 | 26.7  | NaN | NaN   | NaN | NaN   | 23.8  | 23.07 |
| AOA452FNW0 | EEF1G   | Uncharac | 26.96 | 26.8  | NaN | NaN   | NaN | NaN   | NaN   | NaN   |
| AOA452FNT7 | ADPGK   | ADP dep  | 24.25 | 23.78 | NaN | NaN   | NaN | NaN   | 22.54 | 22.68 |
| AOA452FNH4 | ATL3    | Atlaster | 21.87 | 23.39 | NaN | NaN   | NaN | NaN   | NaN   | NaN   |
| AOA452FNE1 | CTDSP1  | CTD smal | 22.35 | 22.59 | NaN | NaN   | NaN | NaN   | NaN   | NaN   |
| AOA452FMD3 | COPB2   | Coatome  | 23.66 | 23.96 | NaN | NaN   | NaN | NaN   | NaN   | NaN   |
| AOA452FLY2 | ZDHHC14 | Palmitoy | 22.91 | 23.7  | NaN | NaN   | NaN | 21.92 | 22.56 | NaN   |
| AOA452FLQ8 | EIF4A1  | Eukaryot | 23.22 | 22.49 | NaN | NaN   | NaN | NaN   | NaN   | NaN   |
| AOA452FLK7 | ATP5PF  | ATP synt | 23.04 | 23.08 | NaN | NaN   | NaN | NaN   | 22.56 | 22.63 |
| AOA452FLJ7 | GFPT1   | Glutami  | 23.56 | 22.63 | NaN | NaN   | NaN | 21.47 | 21.94 | NaN   |
| AOA452FK79 | ATP5MF  | Uncharac | 24.41 | 24.24 | NaN | NaN   | NaN | NaN   | NaN   | NaN   |
| AOA452FK08 | BLVRB   | Biliverc | 22.98 | 22.52 | NaN | NaN   | NaN | NaN   | 22.6  | 22.81 |
| AOA452FJN9 | YIF1A   | Yipl int | 23.05 | 23.17 | NaN | NaN   | NaN | NaN   | NaN   | NaN   |
| AOA452FJF7 | EIF3I   | Eukaryot | 26.09 | 26.07 | NaN | NaN   | NaN | NaN   | NaN   | 22.18 |
| AOA452FJ88 | SCAMP2  | Secretor | 26.22 | 26.05 | NaN | NaN   | NaN | NaN   | 25.58 | 25.13 |
| AOA452FJ27 | DCTN2   | Dynactir | 25.88 | 26.02 | NaN | NaN   | NaN | NaN   | 24.89 | 24.83 |
| AOA452FIZ8 | EXOC5   | Exocyst  | 23.72 | 23.51 | NaN | NaN   | NaN | NaN   | 23.48 | 23.61 |
| AOA452FIX2 | CYB561  | Cytochrc | 23    | NaN   | NaN | NaN   | NaN | NaN   | 22.49 | 22.94 |
| AOA452FIW1 | CCDC47  | Coiled-c | 23.63 | 24.03 | NaN | NaN   | NaN | NaN   | NaN   | NaN   |
| AOA452FIH4 | TXNL1   | Thiorede | 23.83 | 23.94 | NaN | NaN   | NaN | NaN   | 22.36 | 22.64 |
| AOA452FIG7 | ESD     | S-formyl | 23.02 | 23.69 | NaN | NaN   | NaN | NaN   | NaN   | NaN   |
| AOA452FIA8 | SEC63   | SEC63 hc | 23.82 | 23.99 | NaN | NaN   | NaN | NaN   | NaN   | NaN   |
| AOA452FI28 | TBCA    | Tubulin- | 23.36 | 22.83 | NaN | NaN   | NaN | NaN   | 22.54 | 22.9  |
| AOA452FI11 | ERLIN1  | ER lipic | 23.83 | 23.51 | NaN | NaN   | NaN | NaN   | NaN   | NaN   |
| AOA452FHY0 | AQP3    | Aquapor  | 25.14 | 25.63 | NaN | NaN   | NaN | NaN   | NaN   | NaN   |
| AOA452FHU8 | CCDC91  | Coiled-c | 20.28 | 21.78 | NaN | NaN   | NaN | NaN   | NaN   | NaN   |
| AOA452FHM9 | SEPTIN1 | Septin 1 | 23.4  | 22.28 | NaN | NaN   | NaN | NaN   | NaN   | NaN   |

|            |          |          |       |       |     |       |     |       |       |       |
|------------|----------|----------|-------|-------|-----|-------|-----|-------|-------|-------|
| AOA452FHI0 | LOC10211 | Methyltr | 25.34 | 24.99 | NaN | NaN   | NaN | NaN   | 22.73 | 23.42 |
| AOA452FGQ3 | ARPC1B   | Actin-re | 22.36 | 22.62 | NaN | NaN   | NaN | NaN   | NaN   | NaN   |
| AOA452FGI6 | NME3     | Nucleosi | 21.21 | 21.47 | NaN | NaN   | NaN | NaN   | NaN   | 21.68 |
| AOA452FGH0 | TINAGL1  | Tubuloir | 24.52 | 24.38 | NaN | NaN   | NaN | NaN   | 23.55 | 23.51 |
| AOA452FFD7 | CFH      | Uncharac | 23.96 | 23.94 | NaN | NaN   | NaN | NaN   | 22.38 | 22.63 |
| AOA452FF82 | EMC2     | ER membr | 24.25 | 23.16 | NaN | NaN   | NaN | NaN   | NaN   | NaN   |
| AOA452FEY1 | EIF2B2   | Eukaryot | 22.41 | 22.37 | NaN | NaN   | NaN | NaN   | NaN   | NaN   |
| AOA452FEX1 | PLPP1    | Phosphol | 23.67 | 23.16 | NaN | NaN   | NaN | NaN   | 23.39 | 23.3  |
| AOA452FEQ8 | UBTD1    | Ubiquiti | 23.96 | 23.49 | NaN | NaN   | NaN | NaN   | 23.38 | 23.2  |
| AOA452FEP6 | SEC62    | SEC62 hc | 24.69 | 25    | NaN | NaN   | NaN | NaN   | NaN   | NaN   |
| AOA452FEN4 | GPAM     | Glycerol | 23.12 | 23.41 | NaN | NaN   | NaN | NaN   | 22.24 | 22.11 |
| AOA452FEM7 | PRKAG1   | Protein  | 22.57 | 22.86 | NaN | NaN   | NaN | NaN   | NaN   | NaN   |
| AOA452FEH4 | EIF3F    | Eukaryot | 24.96 | 25.49 | NaN | NaN   | NaN | NaN   | NaN   | NaN   |
| AOA452FDS2 | PSMC5    | Proteasc | 23.92 | 23.61 | NaN | NaN   | NaN | NaN   | NaN   | NaN   |
| AOA452FDQ1 | TECR     | Trans-2, | 23.6  | 23.64 | NaN | NaN   | NaN | NaN   | NaN   | NaN   |
| AOA452FDJ3 | RAB33B   | RAB33B,  | 22.76 | 22.3  | NaN | NaN   | NaN | NaN   | 22.46 | 22.19 |
| AOA452FCU2 | FDPS     | Farnesyl | 25.1  | 25.06 | NaN | NaN   | NaN | NaN   | NaN   | NaN   |
| AOA452FBM2 | HSPA9    | Heat shc | 21.75 | 21.41 | NaN | NaN   | NaN | NaN   | 22.08 | 21.68 |
| AOA452FBI7 | PCBP2    | Poly(rC) | 21.74 | 22.05 | NaN | NaN   | NaN | NaN   | NaN   | NaN   |
| AOA452FB58 | SLC25A1  | Solute c | 22.54 | 22.3  | NaN | NaN   | NaN | NaN   | NaN   | NaN   |
| AOA452FB30 | SRPRB    | SRP rece | 26.14 | 26.1  | NaN | NaN   | NaN | NaN   | NaN   | NaN   |
| AOA452FB11 | PSMA1    | Proteasc | 24.97 | 25.31 | NaN | NaN   | NaN | NaN   | 23.69 | 23.4  |
| AOA452FAZ1 | PSMB4    | Proteasc | 25.75 | 25.52 | NaN | NaN   | NaN | NaN   | NaN   | NaN   |
| AOA452FAX2 | LASP1    | LIM and  | 23.04 | 23.08 | NaN | NaN   | NaN | NaN   | 22.88 | NaN   |
| AOA452FAS9 | SUCLG2   | Succinat | 23.39 | 23.44 | NaN | NaN   | NaN | NaN   | NaN   | NaN   |
| AOA452FAQ2 | N/A      | Uncharac | 26.63 | 26.56 | NaN | NaN   | NaN | NaN   | NaN   | NaN   |
| AOA452FA09 | MUC20    | Uncharac | 21.93 | 21.6  | NaN | NaN   | NaN | NaN   | 23.55 | 23.48 |
| AOA452F9S2 | LOC10211 | Ig-like  | 21.73 | 21.85 | NaN | NaN   | NaN | NaN   | NaN   | NaN   |
| AOA452F8M5 | COPE     | Coatome  | 22.56 | 22.06 | NaN | NaN   | NaN | NaN   | NaN   | NaN   |
| AOA452F8I1 | MPDU1    | Mannose- | 25.22 | 24.2  | NaN | NaN   | NaN | NaN   | 23.27 | 23.1  |
| AOA452F8F4 | AIMP1    | tRNA-bir | 25.26 | 25.04 | NaN | NaN   | NaN | NaN   | NaN   | 22.73 |
| AOA452F7R9 | TM4SF18  | Transmen | 26.72 | 26.57 | NaN | 23.55 | NaN | NaN   | 24.66 | 25.05 |
| AOA452F7N8 | AHCYL2   | Adenosyl | 23.59 | 23.32 | NaN | NaN   | NaN | NaN   | NaN   | NaN   |
| AOA452F7I9 | MANF     | Mesence  | NaN   | NaN   | NaN | 23.08 | NaN | NaN   | 22.55 | 22.65 |
| AOA452F7I1 | FKBP3    | Peptidyl | 24.06 | 22.23 | NaN | 21.44 | NaN | NaN   | NaN   | 21.41 |
| AOA452F6Y2 | N/A      | Ig-like  | 24.35 | 24.22 | NaN | NaN   | NaN | 20.51 | 23.85 | NaN   |
| AOA452F6I3 | PGM1     | Phospho  | 23.29 | 23.72 | NaN | NaN   | NaN | NaN   | 23.14 | NaN   |
| AOA452F5Z8 | SPPL2B   | Signal p | 23.78 | 22.81 | NaN | NaN   | NaN | NaN   | 22.4  | 22.02 |
| AOA452F5W5 | SNAP29   | Synaptos | 25.7  | 25.81 | NaN | NaN   | NaN | NaN   | 24.79 | 25.2  |
| AOA452F5W4 | APRT     | Adenine  | 23.84 | NaN   | NaN | 20.29 | NaN | NaN   | NaN   | NaN   |
| AOA452F5I1 | RTRAF    | RNA trar | 22.23 | 22.58 | NaN | NaN   | NaN | NaN   | NaN   | NaN   |
| AOA452F5D1 | SLC1A1   | Solute c | 29.21 | 29.91 | NaN | NaN   | NaN | 25.76 | 28.47 | 28.29 |
| AOA452F561 | KRTCAP2  | Keratin  | 22.75 | 23.22 | NaN | NaN   | NaN | NaN   | 20.31 | NaN   |
| AOA452F550 | PSMD7    | Proteasc | 25.34 | 25.02 | NaN | NaN   | NaN | NaN   | NaN   | NaN   |
| AOA452F4B6 | VCP      | Valosin  | 27.53 | 27.69 | NaN | NaN   | NaN | NaN   | 20.64 | 21.64 |
| AOA452F429 | UCHL3    | Ubiquiti | 23.63 | 23.25 | NaN | NaN   | NaN | NaN   | NaN   | NaN   |
| AOA452F420 | FLOT2    | Flotilli | 25.2  | 25.13 | NaN | 23.82 | NaN | NaN   | 24.13 | 24.28 |
| AOA452F3U3 | CCT5     | Chaperor | 21.54 | 22.37 | NaN | NaN   | NaN | NaN   | NaN   | NaN   |
| AOA452F3P2 | TMEM222  | Transmen | 22.53 | 22.79 | NaN | NaN   | NaN | NaN   | NaN   | NaN   |
| AOA452F2Z5 | GOLPH3L  | Uncharac | 24.61 | 25.26 | NaN | NaN   | NaN | NaN   | 24.29 | 22.99 |

|            |         |          |       |       |     |       |     |       |       |       |
|------------|---------|----------|-------|-------|-----|-------|-----|-------|-------|-------|
| AOA452F2U6 | DNAJB6  | J domain | 20.62 | 23.03 | NaN | NaN   | NaN | NaN   | NaN   | NaN   |
| AOA452F2M7 | NDUFB10 | NADH:ubi | 23.09 | 23.29 | NaN | 21.17 | NaN | NaN   | NaN   | NaN   |
| AOA452F2M3 | LOC1021 | Uncharac | 22.35 | 23.37 | NaN | NaN   | NaN | NaN   | NaN   | NaN   |
| AOA452F2J4 | S100A10 | S100 cal | 22.77 | 23.23 | NaN | NaN   | NaN | NaN   | NaN   | NaN   |
| AOA452F2I2 | EPHX1   | Epoxide  | 28.29 | 28.5  | NaN | NaN   | NaN | NaN   | 25.71 | 25.69 |
| AOA452F1Y8 | SLC39A9 | Solute c | 21.81 | 21.1  | NaN | NaN   | NaN | NaN   | NaN   | NaN   |
| AOA452F1R7 | ST13    | TPR_REGI | 24.76 | 24.69 | NaN | NaN   | NaN | NaN   | 22.84 | 23.04 |
| AOA452F1P5 | RPS28   | Uncharac | 27.68 | 27.45 | NaN | NaN   | NaN | NaN   | NaN   | NaN   |
| AOA452F130 | VPS37B  | VPS37B s | 23.03 | 22.73 | NaN | NaN   | NaN | NaN   | 22.55 | 22.4  |
| AOA452F0Q1 | N/A     | Uncharac | 27.39 | 27.39 | NaN | NaN   | NaN | NaN   | NaN   | NaN   |
| AOA452F0K0 | SRP19   | Signal r | 22.68 | 23.32 | NaN | NaN   | NaN | NaN   | NaN   | NaN   |
| AOA452F0J6 | UGGT1   | UDP-gluc | 26.15 | 26.37 | NaN | NaN   | NaN | NaN   | 22.95 | 21.96 |
| AOA452F0I5 | ATP1A1  | Sodium/t | 26.88 | 26.29 | NaN | NaN   | NaN | NaN   | 22.76 | 23.3  |
| AOA452F0G8 | LTA4H   | Leukotri | 23.92 | 23.98 | NaN | NaN   | NaN | NaN   | 22.55 | NaN   |
| AOA452F0G5 | EIF5A2  | Eukaryot | 26.58 | 26.98 | NaN | NaN   | NaN | 23.42 | 24.96 | 25.21 |
| AOA452F0G2 | HSD17B1 | Hydroxys | 25.38 | 25.74 | NaN | 21.99 | NaN | NaN   | 23.34 | NaN   |
| AOA452F008 | GMPPA   | GDP-manr | 23.81 | 23.74 | NaN | NaN   | NaN | NaN   | NaN   | NaN   |
| AOA452F004 | C1QB    | Compleme | 23.77 | 23.16 | NaN | NaN   | NaN | NaN   | 23.54 | NaN   |
| AOA452EZ33 | DAD1    | Dolichyl | 25.55 | 25.31 | NaN | NaN   | NaN | NaN   | 22.44 | 22.59 |
| AOA452EZ21 | PSMD1   | 26S prot | 23.55 | 23.61 | NaN | NaN   | NaN | NaN   | NaN   | NaN   |
| AOA452EYI5 | MED21   | Mediator | 23.2  | 23.27 | NaN | NaN   | NaN | NaN   | 23.19 | 21.92 |
| AOA452EY73 | PSMD2   | 26S prot | 24.41 | 23.64 | NaN | NaN   | NaN | NaN   | NaN   | NaN   |
| AOA452EY25 |         | Glycyl-t | 21.69 | 21.49 | NaN | NaN   | NaN | NaN   | NaN   | NaN   |
| AOA452EXP6 | RPL30   | Ribosome | 25.98 | 26.82 | NaN | NaN   | NaN | NaN   | 23.94 | NaN   |
| AOA452EXG6 | NAP1L4  | Nucleosc | 22.8  | 23.47 | NaN | NaN   | NaN | NaN   | 22.01 | NaN   |
| AOA452EXC9 | ATP6V1B | Vacuolar | 23.22 | 23.07 | NaN | NaN   | NaN | NaN   | NaN   | NaN   |
| AOA452EWR4 | DHRX    | Dehydrog | 22.86 | 22.29 | NaN | NaN   | NaN | NaN   | NaN   | 23.38 |
| AOA452EW60 | LOC1021 | Uncharac | 24.37 | 24.72 | NaN | NaN   | NaN | 23.43 | 24.3  | 23.88 |
| AOA452EVX4 | TCP1    | T-comple | 25.4  | 25.43 | NaN | NaN   | NaN | NaN   | NaN   | NaN   |
| AOA452EUK4 | PPA1    | Pyrophos | 27.32 | 27.25 | NaN | NaN   | NaN | NaN   | 23.71 | 23.89 |
| AOA452EUB1 | INPP5A  | Inositol | 25.05 | 24.79 | NaN | NaN   | NaN | NaN   | 24.44 | 24.67 |
| AOA452EUA2 | RAB27B  | RAB27B,  | 22.13 | 21.91 | NaN | NaN   | NaN | NaN   | NaN   | NaN   |
| AOA452EU44 | YWHAH   | Tyrosine | 23    | 22.73 | NaN | NaN   | NaN | NaN   | 22.38 | 22.51 |
| AOA452EU23 | LIPG    | Lipase ( | 24.59 | 24.24 | NaN | NaN   | NaN | NaN   | 24.6  | 24.64 |
| AOA452ETZ6 | ACTN1   | Actinin  | 24.56 | 24.62 | NaN | NaN   | NaN | NaN   | NaN   | NaN   |
| AOA452ETY1 | LOC1021 | Uncharac | 24.7  | 24.63 | NaN | NaN   | NaN | NaN   | NaN   | NaN   |
| AOA452ETRO | CMTM8   | CKLF lik | 26.36 | 26.16 | NaN | NaN   | NaN | NaN   | 24.54 | 24.61 |
| AOA452ETA7 | CLTA    | Clathrin | 24.19 | 23.88 | NaN | NaN   | NaN | NaN   | NaN   | NaN   |
| AOA452ET94 | NDRG1   | N-myc dc | 24.3  | 24.22 | NaN | NaN   | NaN | NaN   | NaN   | NaN   |
| AOA452ET01 | PSMB7   | Proteasc | 23.86 | 23.85 | NaN | NaN   | NaN | NaN   | NaN   | NaN   |
| AOA452ESS4 | PGM2    | Phosphog | 21.18 | 20.9  | NaN | NaN   | NaN | NaN   | NaN   | NaN   |
| AOA452ESI0 | EMC10   | ER membr | 22.52 | 23.06 | NaN | NaN   | NaN | NaN   | NaN   | NaN   |
| AOA452ESG4 | RACK1   | Receptor | 27.78 | 27.74 | NaN | 22.9  | NaN | NaN   | NaN   | NaN   |
| AOA452ES44 | TGFBR3  | Transfor | 24.34 | 24.23 | NaN | NaN   | NaN | NaN   | 24.09 | 24.31 |
| AOA452ERM1 | GNG10   | Guanine  | 25.39 | NaN   | NaN | NaN   | NaN | NaN   | 24.68 | 23.81 |
| AOA452ERF6 | C19orf2 | Chromosc | 24.37 | NaN   | NaN | NaN   | NaN | NaN   | 23.98 | NaN   |
| AOA452ERB9 | GAS6    | Growth s | 28.31 | 27.42 | NaN | 24.83 | NaN | NaN   | 27.49 | 27.29 |
| AOA452ER37 | PSMC2   | Proteasc | 23.37 | 23.64 | NaN | NaN   | NaN | NaN   | NaN   | NaN   |
| AOA452EQY7 | F5      | Coagulat | 22.78 | 23.01 | NaN | NaN   | NaN | NaN   | NaN   | NaN   |
| AOA452EQY2 | DDOST   | Dolichyl | 28.99 | 28.26 | NaN | 23.71 | NaN | NaN   | 22.52 | 23.18 |

|            |         |                                       |       |       |     |       |     |       |       |       |
|------------|---------|---------------------------------------|-------|-------|-----|-------|-----|-------|-------|-------|
| AOA452EQF0 | UQCRFS1 | Cytochrome c                          | 24.02 | 23.48 | NaN | 19.48 | NaN | NaN   | NaN   | NaN   |
| AOA452EQE5 | UQCRC1  | Ubiquinol                             | 24.57 | 24.31 | NaN | NaN   | NaN | NaN   | NaN   | 23.23 |
| AOA452EQ53 | FKBP11  | Peptidyl                              | 27.26 | 27.04 | NaN | 21.49 | NaN | NaN   | 24.21 | 24.26 |
| AOA452EQ13 | RPL26L1 | Ribosomal                             | 20.78 | 21.69 | NaN | NaN   | NaN | NaN   | NaN   | NaN   |
| AOA452EPW9 | N/A     | Uncharacterized                       | 24.34 | 24.21 | NaN | NaN   | NaN | NaN   | NaN   | NaN   |
| AOA452EP42 | HHIPL2  | HHIP-like                             | 22.7  | 22.89 | NaN | NaN   | NaN | NaN   | 23.17 | NaN   |
| AOA452ENS6 | ABCC3   | ATP-binding cassette                  | 23.98 | 24.26 | NaN | NaN   | NaN | NaN   | NaN   | NaN   |
| AOA452ENK4 | MYO1D   | Myosin I                              | 22.18 | 22.09 | NaN | NaN   | NaN | NaN   | NaN   | NaN   |
| AOA452ENE9 | C2orf72 | Chromosome 2                          | 22.66 | 22.35 | NaN | NaN   | NaN | NaN   | 21.81 | 21.64 |
| AOA452ENC0 | SEC61G  | SEC61 transmembrane                   | 23.75 | 23.45 | NaN | NaN   | NaN | NaN   | NaN   | NaN   |
| AOA452EN77 | PTPRF   | Protein tyrosine phosphatase          | 25.66 | 25.68 | NaN | NaN   | NaN | NaN   | NaN   | NaN   |
| AOA452EN40 | DHCR7   | 7-dehydrocholesterol reductase        | 21.89 | 22.03 | NaN | NaN   | NaN | NaN   | NaN   | NaN   |
| AOA452EMM4 | TMEM120 | Transmembrane protein                 | 25.18 | 24.81 | NaN | NaN   | NaN | NaN   | NaN   | NaN   |
| AOA452EM22 | TC2N    | Tandem C2 domain                      | 21.96 | 22.35 | NaN | NaN   | NaN | NaN   | 22.19 | 21.85 |
| AOA452ELK2 | ACTR1A  | Actin repressor                       | 26.75 | 26.22 | NaN | NaN   | NaN | NaN   | 23.12 | NaN   |
| AOA452ELB8 | LIFR    | LIF receptor                          | 23.97 | 24.16 | NaN | NaN   | NaN | NaN   | 23.34 | 22.08 |
| AOA452EL27 | EIF3L   | Eukaryotic initiation factor          | 24.57 | 24.3  | NaN | NaN   | NaN | NaN   | NaN   | NaN   |
| AOA452EKZ5 | ZMPSTE2 | CAAX prenylation                      | 21.52 | 21.7  | NaN | NaN   | NaN | NaN   | NaN   | NaN   |
| AOA452EK79 | TMED7   | GOLD domain                           | 25.41 | 25.32 | NaN | NaN   | NaN | NaN   | 22.71 | 22.9  |
| AOA452EIV1 | SEPTIN7 | Septin 7                              | 23.08 | 23.28 | NaN | NaN   | NaN | NaN   | NaN   | NaN   |
| AOA452EIP8 | PTBP3   | Polypyridine                          | 21.56 | 23.33 | NaN | NaN   | NaN | NaN   | NaN   | NaN   |
| AOA452EI06 | CAPZA2  | F-actin capping protein               | 24.41 | 25.32 | NaN | 23.32 | NaN | NaN   | NaN   | 23.61 |
| AOA452EHR0 | TARS    | Threonyl-tRNA synthetase              | 25.17 | 24.91 | NaN | NaN   | NaN | NaN   | NaN   | NaN   |
| AOA452EHN1 | PCOLCE  | Procollagen                           | NaN   | NaN   | NaN | NaN   | NaN | 20.01 | 21.93 | 21.8  |
| AOA452EHJ6 | HADH    | Uncharacterized                       | 25.04 | 25.38 | NaN | NaN   | NaN | NaN   | 24.1  | 23.59 |
| AOA452EH52 | SULT1C4 | Sulfotransferase                      | 22.06 | 22.47 | NaN | NaN   | NaN | NaN   | 22.09 | 21.86 |
| AOA452EGY3 | RPS21   | 40S ribosomal                         | 26.97 | 27.08 | NaN | NaN   | NaN | NaN   | 23.37 | NaN   |
| AOA452EGI2 | STT3B   | STT3 oligomannosidase                 | 23.19 | 22.98 | NaN | NaN   | NaN | NaN   | NaN   | NaN   |
| AOA452EGC2 | VDAC2   | Voltage-dependent anion channel       | 23.94 | 24.53 | NaN | NaN   | NaN | NaN   | NaN   | 23.83 |
| AOA452EG75 | MGST2   | Microsome gamma-glutamyl transaminase | 23.7  | 23.35 | NaN | NaN   | NaN | NaN   | NaN   | 22.41 |
| AOA452EFG2 | TOR1AIP | Torsionless                           | 22.71 | 23.28 | NaN | 21.19 | NaN | NaN   | 23.68 | 23.55 |
| AOA452EFA5 | APMAP   | Adipocyte                             | 25.52 | 25.38 | NaN | 20.96 | NaN | NaN   | 23.72 | 23.35 |
| AOA452EEZ2 | OSTF1   | Osteoclast                            | NaN   | NaN   | NaN | NaN   | NaN | NaN   | 22.66 | 22.15 |
| AOA452EEM0 | RPS27L  | 40S ribosomal                         | 25.18 | 24.87 | NaN | NaN   | NaN | NaN   | NaN   | NaN   |
| AOA452EDZ8 | DHDDS   | Alkyl transferase                     | 24.6  | 24.66 | NaN | NaN   | NaN | NaN   | NaN   | NaN   |
| AOA452ED96 | TAX1BP3 | Tax1-binding protein                  | 24.64 | 24.64 | NaN | NaN   | NaN | NaN   | NaN   | 22.32 |
| AOA452ECX7 | YWHAQ   | 14_3_3 complex                        | 25.24 | 25.1  | NaN | NaN   | NaN | 21.92 | 22.9  | 23.86 |
| AOA452ECW3 | LOC1086 | Uncharacterized                       | 24.96 | 25.2  | NaN | NaN   | NaN | NaN   | NaN   | NaN   |
| AOA452ECM3 | LIN7C   | Protein                               | 22.69 | 23.08 | NaN | NaN   | NaN | NaN   | NaN   | NaN   |
| AOA452EC92 | SRPRA   | SRP receptor                          | 24.39 | 24.27 | NaN | NaN   | NaN | NaN   | NaN   | 22.64 |
| AOA452EC85 | PTX3    | Pentraxin                             | 24.3  | 23.6  | NaN | NaN   | NaN | NaN   | 23.68 | 23.78 |
| AOA452EC68 | ATP8B1  | Phospholipid                          | 22.61 | 22.73 | NaN | NaN   | NaN | NaN   | NaN   | NaN   |
| AOA452EC19 | SSR3    | Signal sequence                       | 27.42 | 27.13 | NaN | NaN   | NaN | NaN   | 23.35 | 23.24 |
| AOA452EBU5 | KCTD12  | Potassium channel                     | 21.87 | NaN   | NaN | 21.23 | NaN | NaN   | NaN   | NaN   |
| AOA452EBT9 | HID1    | HID1 domain                           | 24.35 | 24.39 | NaN | NaN   | NaN | NaN   | NaN   | NaN   |
| AOA452EBE7 | SDSL    | Serine                                | 23.91 | 24.13 | NaN | NaN   | NaN | 22.36 | 23    | 23.11 |
| AOA452EB34 | SLC25A6 | Solute carrier                        | 25.73 | 25.64 | NaN | NaN   | NaN | NaN   | NaN   | NaN   |
| AOA452EB00 | EIF3M   | Eukaryotic initiation factor          | 22.53 | 22.35 | NaN | NaN   | NaN | NaN   | NaN   | NaN   |
| AOA452EAX8 | DPAGT1  | Dolichyl                              | 22.5  | 22.39 | NaN | NaN   | NaN | NaN   | NaN   | NaN   |
| AOA452EA67 | ERLEC1  | Endoplasmic reticulum                 | 25.07 | 25.43 | NaN | NaN   | NaN | NaN   | 23.66 | 24.01 |

|            |         |          |       |       |     |       |     |       |       |       |
|------------|---------|----------|-------|-------|-----|-------|-----|-------|-------|-------|
| AOA452E9W5 | JAGN1   | Jaguna1  | 22.42 | 22.83 | NaN | NaN   | NaN | NaN   | NaN   | NaN   |
| AOA452E9T3 | N/A     | Uncharac | 24.24 | 24.1  | NaN | 22.13 | NaN | NaN   | 23.91 | 23.55 |
| AOA452E9F4 | LOC1086 | eIF2B_5  | 22.27 | 22.38 | NaN | NaN   | NaN | NaN   | NaN   | NaN   |
| AOA452E9E7 | RAP2B   | RAP2B, n | 25.68 | 26.52 | NaN | 22.66 | NaN | 23.55 | 25.82 | 26.34 |
| AOA452E9C1 | EIF3H   | Eukaryot | 23.3  | 23.4  | NaN | NaN   | NaN | NaN   | NaN   | NaN   |
| AOA452E9A3 | CLIC4   | Chloride | NaN   | 23.23 | NaN | NaN   | NaN | NaN   | 23.08 | 23.83 |
| AOA452E8T2 | OLR1    | Oxidizec | NaN   | NaN   | NaN | NaN   | NaN | NaN   | 21.91 | 21.64 |
| AOA452E8N9 | GPD1L   | Glycerol | 22.78 | 22.69 | NaN | NaN   | NaN | 20.87 | 22.63 | 23.15 |
| AOA452E813 | PSMB5   | Proteasc | 23.26 | 23.35 | NaN | NaN   | NaN | NaN   | NaN   | NaN   |
| AOA452E7W8 | PON3    | Paraoxor | 24.91 | 25.4  | NaN | NaN   | NaN | NaN   | 22.86 | 23.06 |
| AOA452E7S5 | DKK3    | Dickkopf | NaN   | NaN   | NaN | NaN   | NaN | NaN   | 22.65 | 22.5  |
| AOA452E7M2 | IMPDH2  | Inosine- | 21.95 | 22.78 | NaN | NaN   | NaN | NaN   | NaN   | NaN   |
| AOA452E7A0 | PLG     | Plasminc | 25.74 | NaN   | NaN | NaN   | NaN | NaN   | 26.97 | 26.82 |
| AOA452E724 | C1QC    | Compleme | 22.47 | NaN   | NaN | NaN   | NaN | NaN   | 22.07 | NaN   |
| AOA452E701 | VAR5    | Valyl-tF | 23.08 | 22.44 | NaN | NaN   | NaN | NaN   | NaN   | NaN   |
| AOA452E6T1 | RPL32   | Ribosomæ | 22.87 | 22.83 | NaN | NaN   | NaN | NaN   | NaN   | NaN   |
| AOA452E6R6 | N/A     | Uncharac | 26.34 | 26.24 | NaN | NaN   | NaN | NaN   | 26.58 | 26.68 |
| AOA452E6J2 | DARS    | Aspartyl | 25.07 | 25.03 | NaN | NaN   | NaN | NaN   | NaN   | NaN   |
| AOA452E6F8 | EIF2S1  | Eukaryot | 24.37 | 24.23 | NaN | NaN   | NaN | NaN   | NaN   | 21.82 |
| AOA452E5Q4 | LOC1086 | Mitochor | 24.18 | 25.44 | NaN | 22.21 | NaN | NaN   | NaN   | NaN   |
| AOA452E5C6 | CMTM6   | CKLF lik | 22.15 | 22.63 | NaN | NaN   | NaN | NaN   | NaN   | NaN   |
| AOA452E5B3 | LOC1086 | Ig-like  | 24.09 | 24.48 | NaN | NaN   | NaN | NaN   | 22.79 | 23.26 |
| AOA452E4F5 | RNASE4  | Ribonucl | 25.95 | 25.76 | NaN | NaN   | NaN | NaN   | NaN   | 24.73 |
| AOA452E4E8 | SPCS2   | Signal p | 26.13 | 26.13 | NaN | NaN   | NaN | NaN   | 23.95 | NaN   |
| AOA452E410 | TMEM59  | Transmen | 21.41 | NaN   | NaN | NaN   | NaN | NaN   | 23.31 | 23.69 |
| AOA452E3Q9 | TMEM125 | Transmen | 22.6  | 22.15 | NaN | NaN   | NaN | 20.2  | NaN   | NaN   |
| AOA452E3F8 | TOR4A   | Torsin f | 23.52 | 23.28 | NaN | NaN   | NaN | NaN   | 24.01 | 23.81 |
| AOA452E398 | PIP4K2C | Phosphat | 21.94 | 23.02 | NaN | NaN   | NaN | NaN   | NaN   | 22.03 |
| AOA452E356 | PSMC3   | Proteasc | 25    | 24.91 | NaN | NaN   | NaN | NaN   | NaN   | NaN   |
| AOA452E2D7 | SEC61A1 | SEC61 tr | 27.79 | 26.67 | NaN | 21.29 | NaN | NaN   | 23.67 | 23.5  |
| AOA452E278 | EIF3B   | Eukaryot | 23.85 | 23.9  | NaN | NaN   | NaN | NaN   | NaN   | NaN   |
| AOA452E1Y6 | TM9SF2  | Transmen | 23.54 | 23.53 | NaN | NaN   | NaN | NaN   | 22.82 | 22.54 |
| AOA452E0V0 | ETF1    | eRF1_1 c | 23.16 | 23.25 | NaN | NaN   | NaN | NaN   | NaN   | NaN   |
| AOA452E0G5 | EIF4E   | Uncharac | 21.31 | 21.79 | NaN | NaN   | NaN | NaN   | NaN   | NaN   |
| AOA452E044 | NIF3L1  | NIF3-lik | 22.82 | 23.16 | NaN | NaN   | NaN | NaN   | NaN   | NaN   |
| AOA452DZV8 | LRATD2  | LRAT don | 25.54 | 25.27 | NaN | NaN   | NaN | NaN   | 24.15 | 23.65 |
| AOA452DZK5 | PSMA5   | Proteasc | 25.57 | 25.61 | NaN | NaN   | NaN | NaN   | 25.04 | 24.46 |
| AOA452DZ71 | GLOD4   | Glyoxalæ | 22.41 | 22.39 | NaN | NaN   | NaN | NaN   | NaN   | NaN   |
| AOA452DZ39 | CRK     | CRK prot | 23.69 | 23.93 | NaN | NaN   | NaN | NaN   | NaN   | NaN   |
| AOA452DYV1 | PA2G4   | Peptidas | 25.2  | 25.33 | NaN | NaN   | NaN | NaN   | NaN   | NaN   |
| AOA452DXX8 | ADGRF5  | Adhesior | 23.22 | 22.71 | NaN | NaN   | NaN | NaN   | NaN   | NaN   |
| AOA452DXH7 | PDXK    | Pyridoxæ | 25.62 | 25.45 | NaN | NaN   | NaN | 20.73 | 22.8  | 22.41 |
| AOA452DX88 | TMEM87A | Transmen | 23.24 | 23.36 | NaN | NaN   | NaN | NaN   | NaN   | 21.36 |
| AOA452DWY1 | VPS29   | Vacuolar | 23.56 | 23.46 | NaN | NaN   | NaN | NaN   | NaN   | NaN   |
| AOA452DWS2 | TSTA3   | Tissue s | 22.86 | 23.84 | NaN | NaN   | NaN | NaN   | 22.01 | 21.86 |
| AOA452DWN7 | NEDD8   | NEDD8 ut | 23.15 | 23.57 | NaN | NaN   | NaN | NaN   | NaN   | NaN   |
| AOA452DW82 | BCAT2   | Branchec | 24.94 | 24.68 | NaN | NaN   | NaN | NaN   | NaN   | NaN   |
| AOA452DW49 | BCAT2   | Branchec | 23.96 | 23.72 | NaN | 22.13 | NaN | NaN   | NaN   | NaN   |
| AOA452DVN5 | RER1    | Protein  | 21.98 | 21.92 | NaN | NaN   | NaN | NaN   | NaN   | NaN   |
| AOA452DVD7 | TMEM214 | Transmen | NaN   | 21.16 | NaN | 21.11 | NaN | NaN   | NaN   | NaN   |

|            |         |          |       |       |     |       |     |       |       |       |
|------------|---------|----------|-------|-------|-----|-------|-----|-------|-------|-------|
| AOA452DU54 | TMEM205 | Transmem | 23.17 | 22.45 | NaN | NaN   | NaN | NaN   | NaN   | 21.27 |
| AOA452DU06 | SNX2    | Sorting  | 20.96 | 20.67 | NaN | NaN   | NaN | NaN   | NaN   | NaN   |
| AOA452DU01 | TPRG1L  | Tumor pr | 24.96 | 24.63 | NaN | NaN   | NaN | NaN   | NaN   | NaN   |
| AOA452DTV6 | RTN4    | Reticulc | 27.64 | 27.35 | NaN | 24.11 | NaN | 23.98 | 25.51 | 25.72 |
| AOA452DTU9 | CFI     | Uncharac | 20.47 | NaN   | NaN | NaN   | NaN | NaN   | 22.24 | 22.4  |
| AOA452DTI0 | COMT    | Catechol | 27.29 | 27.04 | NaN | NaN   | NaN | NaN   | NaN   | NaN   |
| AOA452DTE6 | SEC11C  | Signal r | 25.83 | 26.07 | NaN | NaN   | NaN | NaN   | NaN   | NaN   |
| AOA452DT65 | LOC1086 | GTP-bind | 23.11 | 23.4  | NaN | NaN   | NaN | NaN   | NaN   | NaN   |
| AOA452DT54 | FRK     | Tyrosine | 23.05 | 23.33 | NaN | NaN   | NaN | NaN   | NaN   | 22.42 |
| AOA452DT40 | ACTBL2  | Actin be | NaN   | 29.86 | NaN | NaN   | NaN | NaN   | NaN   | 28.07 |
| AOA452DT26 | PSMD13  | PCI domæ | 24.09 | 24.01 | NaN | NaN   | NaN | NaN   | NaN   | NaN   |
| AOA452DSJ6 | SRP9    | Signal r | 22.41 | 21.78 | NaN | NaN   | NaN | NaN   | NaN   | NaN   |
| AOA452DSJ3 | N/A     | G_PROTEI | 22.79 | 22.9  | NaN | NaN   | NaN | NaN   | NaN   | NaN   |
| AOA452DRI6 | IST1    | IST1 fac | 24.45 | 24.1  | NaN | NaN   | NaN | NaN   | 24.07 | 24.22 |
| AOA452DRD5 | EIF3E   | Eukaryot | 23.77 | 23.57 | NaN | NaN   | NaN | NaN   | NaN   | NaN   |
| AOA452DR09 | PNPO    | Pyridoxæ | 23.46 | 23.11 | NaN | NaN   | NaN | NaN   | NaN   | NaN   |
| AOA452DQ55 | EIF2S3  | Tr-type  | 24.67 | 24.48 | NaN | NaN   | NaN | NaN   | 21.68 | NaN   |
| AOA452DQ07 | PSMD3   | Proteasc | 25.48 | 25.39 | NaN | NaN   | NaN | NaN   | NaN   | NaN   |
| AOA452DPT3 | GOLPH3  | Golgi pl | 23.96 | 24.55 | NaN | NaN   | NaN | NaN   | 24.11 | 23.61 |
| AOA452DPL6 | SNX3    | Sorting  | 23.06 | 23.81 | NaN | NaN   | NaN | NaN   | NaN   | 22.61 |
| AOA452DP54 | BIN2    | BAR domæ | 22.33 | NaN   | NaN | NaN   | NaN | NaN   | 21.46 | 21.44 |
| AOA452DNI4 | MAN2B1  | Uncharac | NaN   | 23.18 | NaN | NaN   | NaN | NaN   | 26.01 | 25.2  |
| AOA452DMZ0 | DPM3    | Dolichol | 23.03 | 22.95 | NaN | NaN   | NaN | NaN   | NaN   | NaN   |
| AOA452DMN3 | SRM     | Spermidi | 22.38 | 22.54 | NaN | NaN   | NaN | NaN   | 22.78 | NaN   |
| AOA452DMM0 | RPN2    | Dolichyl | 27.51 | 27.36 | NaN | NaN   | NaN | NaN   | 23.56 | 22.77 |
| AOA452DM62 | N/A     | Reverse  | 21.96 | 21.79 | NaN | NaN   | NaN | NaN   | 21.89 | 22.24 |
| AOA452DLZ6 | SPCS1   | Signal r | 26.28 | 25.86 | NaN | NaN   | NaN | NaN   | NaN   | NaN   |
| AOA452DLU5 | SEC11A  | Signal r | 24.21 | 24.22 | NaN | NaN   | NaN | NaN   | NaN   | NaN   |
| AOA452DLS5 | ERGIC1  | Endoplas | 27.24 | 23.82 | NaN | 20.36 | NaN | NaN   | 21.29 | 21.4  |
| AOA452DL79 | PRXL2A  | Peroxiro | 23.83 | 23.89 | NaN | NaN   | NaN | NaN   | NaN   | NaN   |
| AOA452DL52 | PFKL    | 6-phosph | 25.77 | 25.27 | NaN | NaN   | NaN | NaN   | NaN   | NaN   |
| AOA452DL24 | PGRMC1  | Progeste | 22.83 | 23.06 | NaN | NaN   | NaN | NaN   | NaN   | NaN   |
| AOA452DKQ4 | ATP11A  | Phosphol | 21.22 | 21.37 | NaN | NaN   | NaN | NaN   | NaN   | NaN   |
| AOA452DK06 | EDF1    | Endothel | 23.12 | 22.98 | NaN | NaN   | NaN | 20.22 | NaN   | 20.89 |
| AOA452DJY2 | VPS26A  | VPS26, r | 25.83 | 25.9  | NaN | NaN   | NaN | NaN   | NaN   | NaN   |
| AOA452DJQ9 | AIFM1   | Apoptosi | 22.58 | 23.27 | NaN | NaN   | NaN | NaN   | NaN   | NaN   |
| AOA0A7CPQ3 | CRABP2  | Cellular | 24.7  | 24.65 | NaN | NaN   | NaN | NaN   | 24.03 | 24.23 |
